1 **Identification of compounds that rescue otic and myelination defects in the**  
2 **zebrafish *adgrg6* (*gpr126*) mutant**

3

4 Elvira Diamantopoulou<sup>1,\*</sup>, Sarah Baxendale<sup>1,\*</sup>, Antonio de la Vega de León<sup>2</sup>, Anzar Asad<sup>1</sup>,  
5 Celia J. Holdsworth<sup>1</sup>, Leila Abbas<sup>1</sup>, Valerie J. Gillet<sup>2</sup>, Giselle R. Wiggin<sup>3</sup> and Tanya T.  
6 Whitfield<sup>1#</sup>

7

8 <sup>1</sup>Bateson Centre and Department of Biomedical Science, University of Sheffield, Sheffield,  
9 S10 2TN, UK

10 <sup>2</sup>Information School, University of Sheffield, Sheffield, S1 4DP, UK

11 <sup>3</sup>Sosei Heptares, Steinmetz Building, Granta Park, Cambridge, CB21 6DG, UK

12

13 \*These authors contributed equally

14

15 #Corresponding author:

16 Tanya T. Whitfield: [t.whitfield@sheffield.ac.uk](mailto:t.whitfield@sheffield.ac.uk)

17 ORCID iD: 0000-0003-1575-1504

18

19 **Key words:** zebrafish, aGPCR, Adgrg6, Gpr126, phenotypic screening, chemoinformatics,  
20 *versican*, myelination, inner ear, lateral line, Schwann cells

21

22

23 **ABSTRACT**

24 Adgrg6 (Gpr126) is an adhesion class G protein-coupled receptor with a conserved role in  
25 myelination of the peripheral nervous system. In the zebrafish, mutation of *adgrg6* also  
26 results in defects in the inner ear: otic tissue fails to down-regulate *versican* gene expression  
27 and morphogenesis is disrupted. We have designed a whole-animal screen that tests for  
28 rescue of both up- and down-regulated gene expression in mutant embryos, together with  
29 analysis of weak and strong alleles. From a screen of 3120 structurally diverse compounds,  
30 we have identified 68 that reduce *versican b* expression in the *adgrg6* mutant ear, 41 of  
31 which also restore *myelin basic protein* gene expression in Schwann cells of mutant  
32 embryos. Nineteen compounds unable to rescue a strong *adgrg6* allele provide candidates  
33 for molecules that interact directly with the Adgrg6 receptor. Our pipeline provides a  
34 powerful approach for identifying compounds that modulate GPCR activity, with potential  
35 impact for future drug design.

36

## 37 INTRODUCTION

38 *Adgrg6* (*Gpr126*) is an adhesion (B2) class G protein-coupled receptor (aGPCR) with  
39 conserved roles in myelination of the vertebrate peripheral nervous system (PNS) (reviewed  
40 in (Langenhan et al., 2016; Patra et al., 2014)). In homozygous loss-of-function *adgrg6*  
41 zebrafish and mouse mutants, peripheral myelination is severely impaired: Schwann cells  
42 associate with axons, but are unable to generate the myelin sheath, and show reduced  
43 expression of the *myelin basic protein* (*mbp*) gene (Glenn and Talbot, 2013; Mogha et al.,  
44 2013; Monk et al., 2009; Monk et al., 2011). Targeted disruption of *Adgrg6* in the mouse  
45 results in additional abnormal phenotypes, including limb and cardiac abnormalities, axon  
46 degeneration and embryonic lethality (Monk et al., 2011; Patra et al., 2014; Waller-Evans et  
47 al., 2010). In humans, mutations in *ADGRG6* are causative for congenital contracture  
48 syndrome 9, a severe type of arthrogryposis multiplex congenita (Ravenscroft et al., 2015).  
49 Peripheral nerves from affected individuals have reduced expression of myelin basic protein,  
50 suggesting that the function of *ADGRG6* in myelination is evolutionarily conserved from  
51 teleosts to humans (Ravenscroft et al., 2015). Human *ADGRG6* variants have also been  
52 proposed to underlie some paediatric musculoskeletal disorders, including adolescent  
53 idiopathic scoliosis (Kamer et al., 2015) (and references within).

54

55 In zebrafish, homozygous loss-of-function *adgrg6* mutants exhibit an inner ear defect in  
56 addition to deficiencies in myelination (Geng et al., 2013; Monk et al., 2009). In the otic  
57 vesicle, the epithelial projections that prefigure formation of the semicircular canal ducts  
58 overgrow and fail to fuse, resulting in morphological defects and ear swelling. Analysis of  
59 the zebrafish *adgrg6* mutant ear shows a dramatic alteration in the expression of genes  
60 coding for several extracellular matrix (ECM) components and ECM-modifying enzymes  
61 (Geng et al., 2013) (Fig. 1A). Notably, transcripts coding for core proteins of the chondroitin  
62 sulphate proteoglycan Versican, normally transiently expressed in the outgrowing  
63 projections and then down-regulated once projection fusion has occurred, remain highly  
64 expressed in the overgrown and unfused projections of *adgrg6* mutants (Geng et al., 2013).  
65 Although *Adgrg6* (*Gpr126*) mRNA is known to be expressed in the mouse ear (Patra et al.,  
66 2013), a role in otic development in the mammal has yet to be determined.

67

68 Like all aGPCR members, the zebrafish *Adgrg6* receptor consists of a long extracellular  
69 domain (ECD), a seven-pass transmembrane domain (7TM), and a short intracellular  
70 domain (reviewed in (Langenhan et al., 2016)) (Fig. 1B). The ECD includes a GPCR  
71 autoproteolysis-inducing (GAIN) domain, which incorporates the GPCR proteolytic site  
72 (GPS) and the conserved Stachel sequence (Liebscher et al., 2014; Patra et al., 2014).  
73 Proteolysis at the GPS results in two fragments, an NTF (N-terminal fragment) and a CTF

74 (C-terminal fragment), which can remain associated with one another, or may dissociate, the  
75 NTF binding to cell surface or extracellular matrix ligands (Patra et al., 2014; Petersen et al.,  
76 2015). Dissociation of the NTF triggers binding of the Stachel sequence to the 7TM domain,  
77 thereby activating the CTF (Liebscher et al., 2014). This feature provides a variety of CTF-  
78 dependent or -independent signalling capabilities that orchestrate cell adhesion and other  
79 cell-cell or cell-matrix interactions. For example, during Schwann cell development and  
80 terminal differentiation, the *Adgrg6* NTF promotes radial sorting of axons, while the CTF is  
81 thought to signal through a stimulatory  $G\alpha_s$  subunit ( $G\alpha_s$ ), leading to elevated cAMP levels  
82 and activated protein kinase A (PKA) to induce transcription of downstream target genes,  
83 such as *egr2* and *oct6* (Petersen et al., 2015). Compounds that act to raise intracellular  
84 cAMP levels, such as the phosphodiesterase inhibitor 3-isobutyl-1-methylxanthine (IBMX)  
85 and the adenylyl cyclase activator forskolin, can rescue phenotypic defects in both the inner  
86 ear and PNS in *adgrg6* mutants (Geng et al., 2013; Monk et al., 2009).

87

88 Despite the enormous importance of GPCRs as drug targets (Hauser et al., 2017; Sriram  
89 and Insel, 2018; Wootten et al., 2018), adhesion class GPCRs remain poorly characterised,  
90 representing a valuable untapped resource as targets of future therapeutics (Hamann et al.,  
91 2015; Monk et al., 2015). The identification of specific modulators of aGPCR activity is an  
92 essential step for understanding the mechanism of aGPCR function and to inform the design  
93 of new drugs. Recent successful approaches include the use of Stachel sequence peptides  
94 as aGPCR agonists (Demberg et al., 2017), or synthetic monobodies directed against  
95 domains within the NTF (Salzman et al., 2017). A promising alternative approach lies in the  
96 potential of unbiased whole-animal screening of small molecules. In recent years, zebrafish  
97 have emerged as an important tool for in vivo phenotypic screening for new therapeutics  
98 (Brady et al., 2016) and for understanding biological mechanisms (Baxendale et al., 2017;  
99 Richter et al., 2017). Zebrafish have many advantages for drug discovery: they are a  
100 vertebrate species whose embryos can fit into individual wells of a multiwell plate, facilitating  
101 high-throughput analysis; they generate large numbers of offspring; they can absorb  
102 compounds directly added to the water, and whole-organism screening enables toxicity,  
103 absorption, metabolism and excretion of compounds to be assayed early in the screening  
104 pipeline.

105

106 To date, over one hundred drug screens using different zebrafish disease models have been  
107 conducted, some identifying lead compounds that have subsequently been tested in  
108 mammalian model systems or entered clinical trials (Chowdhury et al., 2013; Griffin et al.,  
109 2017; North et al., 2007; Owens et al., 2008) (reviewed in (Baxendale et al., 2017)). Two  
110 screens have been performed to identify compounds that promote myelination in the central

111 nervous system (Buckley et al., 2010; Early et al., 2018). These studies used live imaging of  
112 *Tg(olig2:GFP)* or *Tg(mbp:eGFP)* fluorescent transgenic lines to screen for small molecules  
113 that increase progenitor or myelinating oligodendrocyte cell number. While elegant in  
114 design, and successful in identifying hit compounds, these screens required the use of  
115 sophisticated and costly high-resolution imaging platforms and relied on detailed quantitative  
116 assays for cell number, techniques that are not available to all labs and are potentially  
117 limiting in scalability and throughput.

118

119 In this study, we have developed an in vivo drug screening assay based on semi-automated  
120 in situ hybridisation (ISH) to identify modulators of the *Adgrg6* pathway. We have used the  
121 otic expression of *versican b (vcanb)* as an easily-scored qualitative readout to identify  
122 compounds that can reduce *vcanb* overexpression back to normal levels in a hypomorphic  
123 mutant allele for *adgrg6*, *tb233c*. We used expression of *mbp* in the posterior lateral line  
124 ganglion of *adgrg6<sup>tb233c</sup>* mutants as a secondary screening assay, with the aim of identifying  
125 chemical classes capable of rescuing the expression of both genes, which may thus  
126 represent agonists of the *Adgrg6* signalling pathway. To identify ligands that bind directly to  
127 *Adgrg6*, we then tested hit compounds for their ability to rescue a strong loss-of-function  
128 *adgrg6* allele, *fr24*, which predicts a severely truncated protein. Several compounds were  
129 unable to rescue *adgrg6<sup>fr24</sup>* mutants, including a group with similar structures from the  
130 gedunin family of compounds. Compounds able to rescue both alleles include colforsin, a  
131 known activator of adenylyl cyclase, demonstrating proof-of-principle that our screen can  
132 identify compounds that restore GPCR pathway activity downstream of the receptor. These  
133 alternative assays for both down-regulation and up-regulation of gene expression, combined  
134 with a comparison of rescue in both weak and strong alleles, have facilitated selection of a  
135 strong cohort of hit compounds that can be differentiated by the different screens used. Our  
136 approach is scalable and can be used to screen additional compound collections. In  
137 parallel, chemoinformatics analysis of the compound libraries and identified hits has enabled  
138 classification and prioritisation of selected hit compounds.

139

140

## 141 RESULTS

### 142 Choice of markers for an in situ hybridisation-based screen: otic *vcanb* expression as 143 a robust readout

144 We set out to develop a simple assay to identify small molecule modifiers of the *Adgrg6*  
145 pathway that can be used both to understand *Adgrg6* function and to identify compounds  
146 that could inform the design of therapeutics. To this end, we chose to perform a drug screen  
147 based on in situ hybridisation (ISH), which has the advantage of being a simple,  
148 reproducible assay that can be semi-automated (Baxendale et al., 2012; North et al., 2007).  
149 We selected *vcanb* expression in the *adgrg6* mutant ear for our primary screen. *vcanb* has  
150 a number of advantages for screening, including highly localised expression in the otic  
151 vesicle, very strong and reproducible staining intensity in *adgrg6* mutant embryos, and a  
152 clear difference between staining in mutant and wild-type embryos at the stage chosen,  
153 making it ideal for manual scoring (Fig. 1A). We therefore developed a primary screen  
154 seeking compounds that can reduce *vcanb* levels in *adgrg6* mutant embryos and rescue the  
155 mutant phenotype. We reasoned that, in addition to yielding information for the ear  
156 phenotype, compounds that can rescue *vcanb* expression may also rescue myelination  
157 defects in the PNS, where expression patterns of genetic markers are more complex and  
158 defects are harder to score.

159  
160 We first made a careful comparison of the otic and PNS defects in weak (*tb233c*) and strong  
161 (*fr24*) alleles for the *adgrg6* mutant (Fig. 1A). The *tb233c* allele is a missense mutation  
162 (I963N) in the fourth transmembrane domain of the receptor, whereas the *fr24* allele is a  
163 nonsense mutation (L463X), predicting a severely truncated protein lacking the GAIN, 7TM  
164 and C-terminal domains (Geng et al., 2013) (Fig. 1B). Mutants for each allele have the  
165 same defect in semicircular canal formation: otic epithelial projections are enlarged,  
166 overgrown, and fail to fuse to form the three pillars that create the hubs of the semicircular  
167 canal ducts (Geng et al., 2013) (Fig. 1A). Time-lapse imaging using light-sheet microscopy  
168 reveals the dynamics of this process: even when projections make contact with each other,  
169 they fail to adhere as in the wild type. Instead, projections in the mutant ear continue to  
170 grow, roll around one another as they find space with least resistance, and fill the otic vesicle  
171 with semicircular canal projection tissue (Fig. 1C; Supplementary videos 1,2). In wild-type  
172 ears, *vcanb* is expressed in the growing semicircular canal projections between 44 and 72  
173 hours post fertilisation (hpf), but is then strongly down-regulated after fusion; by 4 days post  
174 fertilisation (dpf), very little expression is detectable in the ear (Geng et al., 2013). By  
175 contrast, in *adgrg6* mutants, the overgrown and unfused projections in the developing ear  
176 continue to express *vcanb* at high levels (Geng et al., 2013) (Fig. 1A). Both alleles show a  
177 dramatically increased level of expression over wild-type embryos, but the increase is

178 stronger in the *fr24* allele (Fig. 1A). mRNA for *adgrg6* itself is expressed in mutant embryos  
179 for both alleles (Geng et al., 2013) (and unpublished data).

180

181 In addition to an upregulation of *vcanb* expression in the ear, the zebrafish *adgrg6* mutant  
182 also shows a reduction or loss of expression of the *myelin basic protein (mbp)* gene in the  
183 PNS (Geng et al., 2013; Monk et al., 2009). This additional phenotype proved to be very  
184 valuable for our screen design, helping to validate hits and eliminate false positives.

185 Expression of *mbp* is present in a complex pattern in wild-type embryos, and shows clear  
186 differences between the two alleles, correlating with the predicted severity of the mutations  
187 (Fig. 1B). Expression is variably reduced along the posterior (trunk) lateral line nerve in  
188 homozygous mutants for the hypomorphic *tb233c* allele, but in all individuals there is  
189 consistent absence of staining in cells (presumed Schwann cells) associated with the  
190 posterior lateral line ganglion (PLLg) (Geng et al., 2013) (Fig. 1A). The *fr24* allele lacks  
191 nearly all *mbp* staining along peripheral nerves (Geng et al., 2013) (Fig. 1A). Note that  
192 expression of *mbp* in the central nervous system (CNS) is not affected in either allele,  
193 obscuring any reduction of *mbp* staining in the PNS without performing a detailed analysis.  
194 This made *mbp* expression unsuitable for a primary screen, but useful for a secondary  
195 screen of hit compounds identified from the *vcanb* screen.

196

### 197 **Design of a screening pipeline for compounds that rescue the *adgrg6*<sup>*tb233c*</sup> mutant** 198 **phenotype**

199 Our strategy for the screening protocol and analysis pipeline is outlined in Figure 2. Both the  
200 weak (*tb233c*) and strong (*fr24*) alleles of *adgrg6* mutants are homozygous viable, enabling  
201 large batches of 100% mutant embryos to be generated for each assay. We decided to use  
202 the hypomorphic allele (*tb233c*) in our primary screen, for four main reasons: (1) adult fish  
203 homozygous for the *tb233c* allele produce a larger number of healthy embryos than adults  
204 homozygous for the *fr24* allele; (2) a lower concentration of our positive control compound  
205 IBMX was sufficient to rescue the phenotype in *tb233c* mutants compared with *fr24* mutants  
206 (Geng et al., 2013), suggesting that the *tb233c* allele might also be easier to rescue with  
207 other compounds in the libraries screened; (3) *vcanb* expression, although not as  
208 dramatically affected as in *fr24*, is still robustly over-expressed in the *tb233c* allele, and (4)  
209 we predicted that any small molecules that interact with the active site of the receptor or act  
210 as allosteric modulators would be missed in a screen using *fr24* mutants, which should only  
211 be able to identify compounds acting on targets downstream of the receptor. By using  
212 *tb233c*, we should be able to identify modulators of the pathway acting both downstream  
213 and at the level of the receptor itself.

214

## 215 **Choice of controls**

216 In all assay plates, we included the phosphodiesterase inhibitor IBMX (100  $\mu$ M) as a positive  
217 control. We have previously shown that addition of 100  $\mu$ M IBMX at 60 hpf is optimal for  
218 both down-regulation of *vcanb* expression and a rescue of projection fusion in the ears of  
219 *adgrg6<sup>tb233c</sup>* mutants (Geng et al., 2013). At this stage of development, the anterior and  
220 posterior projections in the mutant otic vesicle are extended and in close proximity to the  
221 lateral projection, to which they would fuse in the wild type (Fig. 2A). Compounds from both  
222 libraries are supplied as stocks dissolved in DMSO; we therefore used 1% DMSO as a  
223 negative control. The *nacre* (*mitfa*<sup>-/-</sup>) strain, which has reduced pigmentation, facilitating  
224 visualisation of ISH staining patterns, was used as an untreated wild-type control. Three  
225 embryos per well were treated with compounds at 25  $\mu$ M in E3 medium from 60–90 hpf,  
226 after which they were fixed and analysed for expression of *vcanb* by whole-mount ISH. At  
227 the embryonic stage assayed by ISH (90 hpf), expression of *vcanb* in untreated mutant  
228 embryos is very specific to the ear, making it clearly visible as two dark spots in the head of  
229 each embryo within the well. All controls gave results as expected in all assay plates tested:  
230 DMSO-treated mutant embryos showed strong otic staining for *vcanb*, untreated wild-type  
231 embryos showed very little staining in the ear, and IBMX-treated mutant embryos showed  
232 rescued (down-regulated) otic *vcanb* expression (Fig. 2A).

233

## 234 **Comparison of compound libraries with diverse structures**

235 In order to test a wide range of compounds, we chose to screen two commercial small  
236 molecule libraries. The Tocriscreen Total library ('Tocris') consists of 1120 compounds  
237 representing known bioactive compounds with diverse structures. The Spectrum Collection  
238 ('Spectrum'; Microsource Discovery Systems) comprises 2000 compounds, including FDA-  
239 approved drugs for repurposing, bioactive compounds and natural products. Scaffold  
240 analysis of the two libraries highlights the structural diversity present (Fig. 3—Supplemental  
241 file 1). Based on Bemis-Murcko scaffolds (Bemis and Murcko, 1996), the Tocris library of  
242 1120 compounds has 693 (62%) scaffolds representing a single compound and only two  
243 scaffolds representing more than 10 compounds. The Spectrum library has 682 scaffolds  
244 representing unique chemical structures, but as the library consists of 2000 compounds, the  
245 proportion of scaffolds represented by a single molecule (30%) is lower than for the Tocris  
246 library. Together, the two libraries cover a wide range of chemical space, with a total of  
247 1540 scaffolds, of which 1134 represent unique compounds. Scaffold analysis not only  
248 provides a broad overview of the chemical diversity of each library, but can also be used to  
249 select and analyse groups of similar compounds with interesting structure-activity  
250 relationships. Compounds were also clustered based on their fingerprint similarity using



251 Ward's method of hierarchical agglomerative clustering, which was useful for visualisation  
252 purposes (for dendrograms, see Fig. 3—Supplemental file 2).

253

### 254 **Results of the primary screen for reduction of otic *vcanb* expression levels**

255 To score the efficacy of the compounds in down-regulating *vcanb* mRNA levels, we used a  
256 scoring system from 0 to 3 (Fig. 3; for details, see the Materials and Methods). In the  
257 primary screen, each compound was tested against three embryos and the score for each  
258 embryo was added to give a final score out of 9. The final scores were classified into  
259 different groups according to the thresholds shown in Figure 3B, with the highest degree of  
260 rescue in Category A, representing a combined score no greater than 2. Completion of the  
261 primary *vcanb* screen for all 3120 compounds identified 92 (8%) compounds from the Tocris  
262 library and 205 (10%) from the Spectrum library that scored in categories A–C (Fig. 3C,E).  
263 5% of the compounds from each library were found to be either toxic (category F; dead  
264 embryos or severe developmental abnormalities) or potentially corrosive (category G; no  
265 embryos present), while 99 (9%) compounds from Tocris and 269 (13%) from Spectrum  
266 were found to cause incomplete or partial suppression of *vcanb* expression (category D).  
267 The largest category (E; 2282 compounds from both libraries, 73%), as expected,  
268 represented compounds that had no rescuing or other effect at the concentration used (25  
269  $\mu$ M). To visualise the complete set of screening results and to identify any clusters of hit  
270 compounds with similar structures, compounds were displayed as individual data points on a  
271 polar scatterplot (Fig. 3D,F; Fig. 4; interactive version at  
272 [https://adlvdl.github.io/visualizations/polar\\_scatterplot\\_whitfield\\_vcanb.html](https://adlvdl.github.io/visualizations/polar_scatterplot_whitfield_vcanb.html)). Compound  
273 position along the circumference of the plot for each library is based on position on the  
274 respective similarity dendrogram (Fig. 3—Supplemental file 2). Data points that are  
275 clustered along radii of the plot are thus more likely to be structurally similar, although note  
276 that the juxtaposition of different branches of the dendrogram can also place compounds  
277 that differ in structure adjacent to one other. Due to the wide diversity of scaffolds found in  
278 the Tocris library, less clustering of hit compounds (A–C) can be observed compared with  
279 the molecules in the Spectrum library, where more clusters of compounds in the A–C  
280 categories are evident (Fig. 3D,F).

281

### 282 **Validation of the primary screen: retesting, comparison with control compounds and** 283 **analysis of duplicates**

284 A large subset of the possible hit compounds categorised as A–C were selected and arrayed  
285 in a cherry-picked plate, which was tested using the same assay format. These included all  
286 the top hit compounds that scored A or B, and a selection of compounds from the lower-  
287 scoring C category. Specifically, 83 out of the 92 possible hit compounds from the Tocris

288 library and 145 of the 205 possible hits from the Spectrum library were retested twice, again  
289 with three embryos per well. By increasing the number of embryos screened to a total of  
290 nine per compound, we aimed to eliminate any false-positive hits that had an increased  
291 average score over these two retests. In addition, after each retest, any compounds that did  
292 not show a clear rescue (score >7) were not followed through to the next stage. In total, 91  
293 compounds from the combined list of hits (29 from Tocris, 62 from Spectrum) that showed  
294 consistent rescue of *vcanb* expression across the retests were taken forward for secondary  
295 assays (Supplemental Table S1).

296

297 To evaluate the success rate of the hit compound selection process, we compared the hits in  
298 each original category with the final category based on the average score for the nine  
299 embryos (and in a few cases, six embryos). We were interested to know if the hits in the  
300 original C category were less likely to be selected after the retest and therefore by choosing  
301 a threshold of A or B scores we were choosing the strongest hits. We found that of the 191  
302 hit compounds that originally scored A or B, 184 rescreened with a score of A–C, and 7  
303 compounds showed some toxicity (Fig. 4A–C). In comparison, of the 33 compounds with an  
304 original C score that were retested, 9 scored as B or C, 23 scored as D, and one compound  
305 scored as F (toxic). Thus, for our assay, >60% of potential hits with an original C score did  
306 not pass a hit threshold in the retest, whereas >96% of hits with an original A or B score  
307 were selected again in the retests.

308

309 To provide further validation for the hits identified in the primary screen, we used two  
310 approaches. Firstly, we compared the results of our control compounds to those of similar  
311 compounds present in the screened compound libraries. The control compound IBMX, a  
312 non-selective phosphodiesterase (PDE) inhibitor, is present in the Spectrum library and was  
313 identified as a hit in the primary screen (Fig. 2A). The most similar compound to IBMX from  
314 both libraries is 8-methoxymethyl-3-isobutyl-1-methylxanthine (MMPX), a selective PDE-1  
315 inhibitor. MMPX is present in the Tocris library, but was not identified as a hit in our screen,  
316 most likely due to its selectivity. In previous work we also used forskolin to raise cAMP  
317 levels and rescue the *adgrg6* ear phenotype (Geng et al., 2013), but forskolin requires  
318 different assay conditions with short drug incubation times to avoid toxicity. Forskolin is  
319 represented in the Tocris library, but was toxic in our screening assay. The Spectrum  
320 Collection contains two forskolin-related compounds, colforsin and desacetylcolforsin.  
321 Colforsin, a water-soluble derivative of forskolin, was identified as a hit in the primary screen,  
322 and retested positive in all subsequent tests (see also below); it appeared to be less toxic  
323 than forskolin, whereas desacetylcolforsin was toxic at the concentration used. The

324 identification of both IBMX and colforsin as hits in the primary screen confirmed that the  
325 assay conditions used were efficient at detecting expected hit compounds.

326

327 Secondly, we compared the scores for all compounds that were duplicated in both  
328 compound libraries. Chemoinformatics analysis of the Tocris and Spectrum libraries  
329 identified 155 compounds represented in both libraries, 65% of which (100/155) had exactly  
330 the same *vcanb* score average from the two individual screens. 39 (25%) of the 155  
331 duplicate compounds yielded a *vcanb* score average that differed by 1–2 units between the  
332 two libraries; 12 (8%) of the compounds yielded a *vcanb* score average that differed by 3–6  
333 units, while only 4 (3%) compounds had a score average that differed by 7–9 units. In  
334 summary, 90% (139/155) of the compounds common to both libraries showed similar scores  
335 for the *vcanb* assay from each library (scores differing by  $\leq 2$  units), while 10% (16/155) of  
336 the compounds resulted in differing levels of *vcanb* down-regulation between the two  
337 different libraries. After retesting, the difference between the two *vcanb* score averages for  
338 nine of these compounds was reduced; however, for seven compounds, the scores between  
339 the two libraries remained significantly different. These discrepancies could be either due to  
340 differences in compound purity between the two suppliers, or could be due to experimental  
341 error (e.g. in the concentration used, or during the ISH protocol). In cases where the same  
342 compound was scored as toxic in one assay and not in another, the health condition of the  
343 fish in a particular well could be the underlying reason. Duplicated compounds have been  
344 included in the data for each library in the polar scatter plots (Figs 3,4).

345

346 The top 91 hit compounds from both libraries (29 from Tocris, 62 from Spectrum) that scored  
347 A–C in all three *vcanb* assays were combined to give a complete list of 89 unique  
348 compounds, with baicalein and gedunin present in both libraries. The list covers a wide  
349 spectrum of naturally-derived and synthetic molecules, with known and unknown functions  
350 (Supplementary Table S1). The hit compounds with known functions include calcium  
351 channel blockers, antifungal, anti-inflammatory, antihyperlipidemic, antibacterial and  
352 anthelmintic agents, as well as compounds with known antineoplastic and vasodilatory  
353 properties.

354

### 355 **Secondary screen for rescue of *mbp* expression, and identification of false positives**

356 The two retests for *vcanb* expression significantly reduced the possibility of false-positive  
357 results due to experimental error (e.g. in the ISH protocol), but the list of hits could still  
358 contain false-positive compounds that may generally inhibit transcription or cause  
359 developmental arrest of the embryo. In order to eliminate such compounds, we exploited  
360 the expression of *mbp* as a secondary screening assay, testing for rescue of expression in

361 the posterior lateral line ganglion (PLLg) and from three small regions near the cristae of the  
362 inner ear (Fig. 4D; Materials and Methods). This counterscreen has the advantage of  
363 assessing for up-regulation (restoration) of *mbp* expression in mutant embryos, in contrast to  
364 the down-regulation of *vcanb* expression in the primary screen. All compounds that passed  
365 the first retest for *vcanb* (89 compounds in total) were subjected to this secondary assay for  
366 *mbp* expression. We used the same assay format and treatment time window as for *vcanb*,  
367 as we had previously found that treatment with IBMX between 60 and 90 hpf was also able  
368 to rescue *mbp* expression in *adgrg6* mutants (not shown).

369

370 Following two experimental repeats ( $n=6$  fish tested per drug), compounds were categorised  
371 into groups based on their average *mbp* score. These included groups of compounds that  
372 showed rescue of the mutant phenotype (an increase of *mbp* expression, specifically in the  
373 PLLg); no rescue (*mbp* expression equivalent to that in untreated *adgrg6<sup>tb233c</sup>* mutants), and  
374 those that resulted in a decrease in *mbp* expression, as shown in Figure 4D. We identified  
375 41 compounds (12 from Tocris, 29 from Spectrum) that rescued *mbp* expression and thus  
376 represent possible modulators of Adgrg6 pathway (Fig. 4E,F; Table 1). Twenty-eight hit  
377 compounds (15 from Tocris, 13 from Spectrum) strongly down-regulated *vcanb* expression  
378 but did not affect *mbp* expression in *adgrg6<sup>tb233c</sup>* mutants. These could represent  
379 compounds that can rescue *vcanb* expression in an inner ear-specific or Adgrg6-  
380 independent manner. Alternatively, as all the assays were carried out at a single  
381 concentration (25  $\mu$ M), it is possible that some or all of these compounds could rescue *mbp*  
382 expression at a higher concentration (as is the case for IBMX with the *fr24* allele). The 28  
383 members of this group are structurally and functionally diverse (Supplementary Table S1).  
384 Finally, 22 compounds (2 from Tocris, 20 from Spectrum) reduced the expression of both  
385 *vcanb* and *mbp*. This latter group—potential false positives in the *vcanb* assay—could  
386 represent general inhibitors of transcription or development, and were excluded from further  
387 analysis, resulting in a final list of 68 hit compounds (Supplementary Table S1).

388

### 389 **Compounds that can rescue both inner ear and myelination defects**

390 The 41 compounds that could both down-regulate *vcanb* expression and restore *mbp*  
391 expression to wild-type levels in *adgrg6<sup>tb233c</sup>* mutants, presumed modulators of the Adgrg6  
392 signalling pathway (Table 1), are highlighted on the final combined polar scatter plot (Fig.  
393 4G). Although hit compounds are scattered around the plot, some clustering is evident, and  
394 we chose two groups for further analysis (Fig. 4G; boxes at 300, 2500). These groups with  
395 five or more compounds included the pyridines (cluster 1 on the scatter plot) and the  
396 tetranortriterpenoids (gedunin derivatives) (cluster 2 on the scatter plot). The pyridine  
397 cluster included one pyrazolopyridine and six dihydropyridines, a class of L-type calcium

398 channel blockers with vasodilatory properties (reviewed in (Tocci et al., 2018)). The  
399 gedunins are a family of naturally occurring compounds, previously attributed with  
400 antineoplastic and neuroprotective effects (Jang et al., 2010; Subramani et al., 2017).

401

402 Data from each of the screens and retests were used to cluster the compounds into groups  
403 based on their activity (displayed as a heat map in Fig. 5A), and compared with a compound  
404 network display based on structural similarity in Fig. 5B; interactive version at  
405 [https://adlvdl.github.io/visualizations/network\\_whitfield\\_vcanb\\_mbp/index.html](https://adlvdl.github.io/visualizations/network_whitfield_vcanb_mbp/index.html)). A selection  
406 of compounds was chosen for further study (Figs 6–8). As many of the compounds  
407 classified as putative *Adgrg6* pathway modulators were dihydropyridines (cluster 1, Fig. 4),  
408 two compounds were chosen from this class for further study (cilnidipine and nifedipine).  
409 The third compound that was chosen was tracazolate hydrochloride, a pyrazolopyridine  
410 derivative belonging to the nonbenzodiazepines and a known  $\gamma$ -aminobutyric acid A (GABA<sub>A</sub>)  
411 modulator (Thompson et al., 2002), which strongly down-regulated *vcanb* expression to wild-  
412 type levels. FPL 64176 was also chosen for further analysis, based on its potent efficacy in  
413 down-regulating *vcanb*, and the fact that it was the only calcium channel modulator (Liu et  
414 al., 2003) that did not rescue *mbp* expression efficiently. Initial experiments to repeat the  
415 rescue of the *vcanb* and *mbp* expression with freshly-sourced compounds from alternative  
416 suppliers (see Materials and Methods) confirmed that the pyridines cilnidipine, nifedipine and  
417 tracazolate hydrochloride were able to decrease otic *vcanb* expression and increase *mbp*  
418 expression in the PLLg in mutant embryos for the *tb233c* allele, whereas FPL 64176 was  
419 able to reduce *vcanb* expression but was unable to restore *mbp* expression to wild-type  
420 levels (Fig. 6C).

421

#### 422 **Nifedipine, cilnidipine, tracazolate hydrochloride and FPL 64176 rescue otic defects in** 423 ***adgrg6*<sup>*tb233c*</sup> mutants in a dose-dependent manner**

424 The four compounds shown in Figure 6 were also selected for dose-response assessment,  
425 by exposing *adgrg6*<sup>*tb233c*</sup> embryos to concentrations ranging from 0.3  $\mu$ M to 222.2  $\mu$ M  
426 between 60–110 hpf. Nine embryos were tested for each concentration, and a 1.5-fold  
427 dilution series of each drug was used. ISH analysis of the 110-hpf embryos revealed a  
428 robust, dose-dependent down-regulation of *vcanb* mRNA expression in response to  
429 treatment with all four drugs (Fig. 7). Expression of *vcanb* mRNA was assessed by  
430 annotating each embryo with two scores, one representing the intensity of the stain (score  
431 as in Fig. 3A) and the other representing the number of projections stained (Fig. 7A). All  
432 four drugs were able to reduce both the intensity of the ISH staining and the number of  
433 projections stained in the ear in a dose-dependent manner. For each of the four drugs, the

434 intensity of the *vcanb* staining decreased even after treatment with low doses, whereas  
435 higher doses were needed to reduce the number of the projections stained.

436

437 In order to investigate whether other aspects of the ear phenotype in *adgrg6<sup>tb233c</sup>* mutants  
438 could be rescued by compound treatment, the inner ears of live treated embryos were  
439 observed with differential interference contrast (DIC) optics at 110 hpf (or 90 hpf in the case  
440 of FPL 64176, due to its toxicity). Consistent with the *vcanb* scores for the number of  
441 projections stained, live DIC images of the inner ear revealed a dose-dependent rescue of  
442 projection fusion and pillar formation, which was greater at higher doses (Fig. 7). As  
443 *adgrg6<sup>tb233c</sup>* mutants have a swollen ear phenotype (Geng et al., 2013), measurements of the  
444 ear-to-ear width, normalised for size differences between individuals, were taken from  
445 photographs of live embryos mounted dorsally. The results showed a dose-dependent  
446 reduction in ear swelling with increased concentration of the four drugs (Fig. 7C; Fig. 7—  
447 Supplemental file 1). LD50 concentrations were also determined for each of the four  
448 compounds and ranged from 19.2  $\mu$ M (cilnidipine) to 51.7  $\mu$ M (tracazolate hydrochloride)  
449 (Fig. 7—Supplemental file 2).

450

#### 451 **Test for rescue of *vcanb* expression in the *fr24* allele: screen for Adgrg6-specific** 452 **ligands**

453 The initial screen was performed on the hypomorphic *tb233c* allele. We differentiated our hit  
454 compounds further by re-screening for *vcanb* expression in a strong *adgrg6* allele, *fr24* (Fig.  
455 1B), to identify compounds that could potentially interact directly with the Adgrg6 receptor  
456 itself. We predicted that any compounds able to rescue both alleles (such as IBMX at higher  
457 concentrations) are likely to act downstream of the receptor. On the other hand, hits that  
458 rescued *tb233c*, but were not able to rescue *fr24*, are likely to act as putative agonistic  
459 ligands for the Adgrg6 receptor. Of the 41 hit compounds able to rescue both *vcanb* and  
460 *mbp* in the *tb233c* allele, we identified 10 compounds that also rescued *vcanb* expression in  
461 the *fr24* screen (score sum 0–7 in Table 1, yellow), 12 compounds that gave a partial or  
462 inconclusive rescue (white), and 19 compounds that did not affect *vcanb* expression in the  
463 *fr24* screen (score sum 9 in Table 1, grey). The first group (yellow) are presumed to act  
464 downstream of the Adgrg6 receptor, and include colforsin, which tested positive in all assays  
465 and is a known activator of adenylyl cyclase, supporting this interpretation (Fig. 8). The last  
466 class (grey) are of particular interest as they represent candidates for molecules that interact  
467 directly with the receptor. Examples of the difference in ability to rescue the two *adgrg6*  
468 alleles between the two classes can be seen in Figure 8C.

469

470 Interestingly, four of the 19 compounds in the last group are in the cluster of gedunin  
471 derivatives identified in Figure 4 (cluster 2), with deoxygedunin being one of the top ten most  
472 potent drugs able to rescue the *tb233c* allele. The compound network shows that 38  
473 compounds with structural similarity to the gedunins are represented in the two libraries  
474 (Figs 5,8). In the primary screens, 25/38 (66%) gedunin-related compounds affected *vcanb*  
475 expression to some extent (18 compounds in categories A–C and 7 in D), 9 compounds  
476 were inactive and 4 were toxic. The majority of the gedunin-related compounds that passed  
477 both rounds of retesting were later found also to rescue *mbp* expression (8/10, 80%). The  
478 shared structural characteristics of the gedunin group may give useful clues for candidate  
479 structures of agonistic ligands for Adgrg6. In summary, our study demonstrates a novel  
480 screening approach which, when combined with chemoinformatics analysis, is able to  
481 delineate both expected downstream rescuers of the Adgrg6 pathway and several  
482 candidates for drugs that may interact directly with the Adgrg6 receptor.  
483

## 484 DISCUSSION

485 Adhesion GPCRs are critical regulators of development and disease, driving cell-cell and  
486 cell-ECM communications to elicit internal responses to extrinsic cues. This study set out to  
487 identify positive modulators of the *Adgrg6* signalling pathway, a key regulator of myelination  
488 and inner ear development in the zebrafish embryo. Use of a whole-animal phenotypic  
489 (mutant rescue) screen gave the potential to identify compounds affecting the entire *Adgrg6*  
490 pathway in the correct cellular context. We have used a simple in situ hybridisation  
491 approach to assay *vcanb* expression in the inner ear of *adgrg6* mutants, exploiting an easily  
492 identifiable phenotype that could be scored manually. Following our primary screen of 3120  
493 small molecules, we tested 89 hit compounds in a counter screen for rescue of the  
494 myelination defect in *adgrg6* mutant embryos. We identified 41 compounds that can both  
495 rescue *vcanb* expression in the inner ear and *mbp* expression in Schwann cells of *adgrg6*  
496 hypomorphic mutants, suggesting these are *Adgrg6* pathway-specific modulators. Further  
497 analysis of a strong *adgrg6* allele, *fr24*, identified a subset of 19 compounds that are  
498 potential direct interactors of the *Adgrg6* receptor. This analysis, combined with  
499 chemoinformatics analysis of the identified hit compounds, has identified clusters of  
500 compounds acting at different levels of the *Adgrg6* pathway.

501

502 An optimal drug screening assay design identifies the maximum number of hit compounds  
503 with the minimum number of false positives and false negatives. Chemical screening  
504 assays using zebrafish range from simple morphology screens (Yu et al., 2008) through to  
505 high-tech, automated methods for quantitative image analysis (Early et al., 2018) or  
506 behavioural analysis (Bruni et al., 2016; Rennekamp et al., 2016) (reviewed in (Kalueff et al.,  
507 2016)). We used an in situ hybridisation screen to analyse gene expression changes, as  
508 this has the advantages of being scalable to different sized projects and relatively  
509 inexpensive to perform—with results that are stable and reproducible. Spatial resolution of  
510 staining patterns can be accurately scored: expression pattern screens have recently been  
511 used to identify small molecules that can induce subtle differences in gene expression  
512 domains along the pronephros (Pouretezadi et al., 2016) and in the somites (Richter et al.,  
513 2017). Although quantification of gene expression levels is less reliable with an enzymatic  
514 reaction compared with a fluorescent signal, we utilised the strong contrast between the high  
515 *vcanb* expression in the ear of *adgrg6* mutant fish compared with the low expression in a  
516 small dorsal region of the wild-type ear at 4 dpf to produce a robust scoring system for our  
517 phenotype rescue.

518

519 Relatively few zebrafish screens have been undertaken to identify compounds that can  
520 increase myelination (Buckley et al., 2010; Early et al., 2018) or restore myelination in



521 neuropathy models (Zada et al., 2016), which is in part due to the complex distribution of  
522 glial cells in both the CNS and PNS. Performing the primary screen using our ear marker,  
523 *vcanb*, enabled us to bypass the difficulties of scoring and quantification of *mbp* staining on  
524 a large scale; instead, *mbp* expression was used as a counter screen on a limited number of  
525 cherry-picked hits. Contrary to the primary assays, which screened for down-regulation of  
526 *vcanb* expression, the counter screen assayed for up-regulation of *mbp* expression, enabling  
527 the identification of 21 false-positive compounds that down-regulate the expression of both  
528 genes (presumably by inhibiting transcription).

529

530 Determining the false-negative rate for any screen is difficult. In our assay we used only one  
531 concentration of compound (25  $\mu$ M), so it is likely that we missed compounds that were toxic  
532 or where the dose was suboptimal; these may be effective at different concentrations. One  
533 possibility would be to run a parallel screen at a lower or higher concentration or use an  
534 alternative protocol with shorter incubation times, an approach that has recently proved  
535 successful at identifying different compounds influencing segmentation in zebrafish (Richter  
536 et al., 2017). Here, the compounds were found to be most active in the range of 10–50  $\mu$ M,  
537 supporting our choice of 25  $\mu$ M for the primary screen. However, increasing the number of  
538 replicates with different drug concentrations or assay conditions has significant implications  
539 on the cost and time taken to complete the screen, reducing the number of compounds  
540 analysed and the potential hits identified. Our minimum estimate for the false-negative rate  
541 is 5%, based on the seven compounds (out of a total of 155) that were duplicated in both  
542 libraries and had a significantly different score after retesting, being classified as a hit in one  
543 library but not in the other. It is possible that this is due to differences in chemical purity from  
544 the different suppliers. Other false-negative compounds could include those that are unable  
545 to penetrate into the ear. Neomycin, for example, is toxic to the superficial hair cells of the  
546 lateral line system, but is ineffective on inner ear hair cells unless microinjected into the ear  
547 (Buck et al., 2012). Other compounds that we will have missed could include myelination-  
548 specific compounds, as the primary assay scored for the ear phenotype only. Given that  
549 several compounds were positive hits for the rescue of *vcanb* in the ear and negative for  
550 *mbp*, it is likely that tissue-specific functions of *Adgrg6* are mediated through different  
551 downstream pathways or are stimulated by different ligands.

552

553 Our positive control compound, IBMX, was identified independently through our screen as a  
554 category A hit. The hit compound colforsin was found to be more potent and less toxic than  
555 the related control compound forskolin, and had the highest score in every assay, showing  
556 full rescue of our strongest *fr24* allele. Both these observations highlight the robustness of  
557 the assay and the consistency of the scoring process. In total, the final number of hit

558 compounds identified was similar in both the compound libraries screened, with 42  
559 compounds identified from the Spectrum library (2.1%) and 27 compounds from the Tocris  
560 library (2.4%). These hit rates are comparable to those found in other similar screens  
561 (Baxendale et al., 2012; Vettori et al., 2017). Chemoinformatics analysis and visualisation of  
562 the results provided additional context to the identified hit compounds. The polar scatter plot  
563 displayed an initial overview of the results and allowed the identification of clusters of active  
564 compounds with similar structure. The compound network focused the analysis on highly  
565 detailed similarity relationships inside each compound cluster, yielding a wealth of structure-  
566 activity relationship information that could prove very useful for any future optimisation of the  
567 identified hit compounds.

568

569 Of the 41 hit compounds able to rescue both inner ear and myelination phenotypes, 23 are  
570 grouped in six different structurally-related clusters. Seven of the 41 hit compounds that  
571 rescued *vcanb* and *mbp* expression are Ca<sup>2+</sup>-channel modulators. Six of these (nifedipine,  
572 cilnidipine, nitrendipine, nimodipine, efonidipine, niguldipine) belong to the chemical group of  
573 dihydropyridines (cluster 1), some of which have neuroprotective effects in murine models.  
574 Nimodipine, for example, has been shown to trigger remyelination in a mouse model of  
575 multiple sclerosis and to improve repair in peripheral nerve crush injuries in rats (Schampel  
576 et al., 2017; Tang et al., 2015). As dihydropyridines have been reported to inhibit cAMP  
577 phosphodiesterases (Sharma et al., 1997), protection of cAMP from degradation might be  
578 another mechanism whereby these molecules exert their ameliorating action on the *adgrg6*  
579 mutant phenotype.

580

581 Phenotypic screens are advantageous for assessing models of multifactorial pathological  
582 conditions, such as hereditary neuropathies and cancer (reviewed in (Baxendale et al.,  
583 2017)). However, one of the challenges for phenotypic screening is the identification of the  
584 specific target for any hit compound, as multiple pathways and different cell types can  
585 contribute to a positive read-out in the screening assay. Our aim was to identify compounds  
586 that are likely to interact directly with the Adgrg6 receptor. We were able to separate hit  
587 compounds into different groups based on their ability to rescue otic phenotypes caused by  
588 missense (*tb233c*) and nonsense (*fr24*) mutations. In total, we found 19 hits that could  
589 rescue *vcanb* expression and *mbp* expression in the *tb233c* allele, but were unable to  
590 rescue the *fr24* allele. We hypothesise that the *fr24* allele is unable to produce the full-  
591 length Adgrg6 protein, and therefore any compounds that interact directly with the receptor  
592 would not be able to rescue this strong allele. Further analysis will be needed to determine  
593 whether any of these compounds can bind directly to the Adgrg6 receptor. However, this  
594 approach of using a combination of null and hypomorphic alleles in zebrafish whole-

595 organism screening with the aim of identifying target-specific compounds is particularly  
596 exciting and one that the advent of CRISPR/Cas9 technology is placed to take full  
597 advantage of, since it is now possible to generate designer mutations in the zebrafish  
598 through homology-directed repair (Hruscha et al., 2013; Hwang et al., 2013; Komor et al.,  
599 2016).

600

601 It is of interest to note that one of the main groups of compounds identified as potential  
602 interactors of the receptor in the *fr24* screen is a cluster of gedunin derivatives (cluster 2).  
603 One of these compounds, deoxygedunin, has previously been identified as a TrkB agonist  
604 that has neuroprotective properties (Nie et al., 2015), can promote axon regeneration after  
605 nerve injury (English et al., 2013), and, interestingly, has been found to protect the vestibular  
606 ganglion from degeneration in mice mutant for *BDNF* (Jang et al., 2010). More recently,  
607 gedunin derivatives, including 3- $\alpha$ -DOG, have been shown to act as partial agonists for the  
608 closely related aGPCR, ADGRG1 (formerly GPR56) (Stoveken et al., 2018), a key regulator  
609 of myelination in both the CNS and PNS (Ackerman et al., 2015; Ackerman et al., 2018;  
610 Giera et al., 2015; Salzman et al., 2016). While further work will be necessary to determine  
611 if gedunin-type molecules can also bind and activate zebrafish *Adgrg6* by interacting directly,  
612 these studies set a precedent for this type of interaction.

613

614 GPCRs can be modulated by the membrane lipid cholesterol, where interactions with the  
615 7TM domain can provide plasticity for the receptors by altering their stability and structure  
616 (Huang et al., 2018; Prasanna et al., 2016). In addition, cholesterol can activate the  
617 hedgehog signalling pathway directly by binding to the extracellular domain of the GPCR  
618 Smoothed (Huang et al., 2018; Luchetti et al., 2018). Although cholesterol was not  
619 identified as a hit in our primary screen, we did identify two cholesterol-lowering drugs,  
620 ezetimibe (Altmann et al., 2004) and rosuvastatin (Istvan and Deisenhofer, 2001), as  
621 putative modulators of the *Adgrg6* pathway. Whether these act by altering the activity of  
622 *Adgrg6* through altering cholesterol levels remains to be determined.

623

624 In addition to the dihydropyridines (cluster 1) and the tetranortriterpenoid (gedunin-derived)  
625 compounds (cluster 2), there are also clusters of steroid hormones (danazol,  
626 hydroxyprogesterone, pregnenolone succinate, hydrocortisone hemisuccinate) and flavonoid  
627 compounds (baicalein, tangeritin, nobiletin, dimethylnobiletin, hexamethylquercetagenin).  
628 The flavonoids are a group of molecules with wide ranging activities, including anti-cancer  
629 (Ma et al., 2015) and neuroprotective properties (reviewed in (Braidly et al., 2017)). All four  
630 O-methylated flavonoids that rescued *vcanb* and *mbp* expression in *tb233c* mutants were

631 also able to rescue *fr24* allele in our assay, suggesting that they act downstream of the  
632 Adgrg6 receptor.

633

634 Our screen identified 28 compounds that down-regulated *vcanb* expression but did not  
635 rescue *mbp* expression, which may provide useful tools to manipulate semicircular canal  
636 formation in vivo. Versican and other chondroitin sulphate proteoglycans (CSPGs) are  
637 associated with a number of human pathologies; Versican overexpression has been shown  
638 to be strongly involved in inflammation, cancer progression and the development of lung  
639 disorders (reviewed in (Andersson-Sjöland et al., 2015; Ricciardelli et al., 2009; Wight et al.,  
640 2017)). CSPGs and hyaluronan are components of the inhibitory scar that forms at the site  
641 of injury after CNS damage, preventing axon regeneration (Silver and Miller, 2004). In  
642 addition, CSPGs have been shown to inhibit the ability of oligodendrocytes to remyelinate  
643 axons, a process that is reversed by reduction of CSPG levels (Keough et al., 2016;  
644 Pendleton et al., 2013). Whether the down-regulation of CSPGs to promote remyelination  
645 occurs via a similar mechanism to that involved in Adgrg6-regulated projection fusion  
646 remains to be determined. However, it is of interest that a key regulator of myelination,  
647 Adgrg1, has also been recently shown to reduce fibronectin deposition and inhibit cell-ECM  
648 signalling to prevent metastatic melanoma growth (Millar et al., 2018).

649

650 In conclusion, our data show that *vcanb* expression in the *adgrg6<sup>tb233c</sup>* mutant ear provides a  
651 robust, easy-to-use screening tool to identify drugs that target the Adgrg6 pathway. In  
652 combination with the different alleles available for *adgrg6* in zebrafish, this in vivo platform  
653 provides an excellent opportunity to find hit compounds specific for Adgrg6 in counter  
654 screens. These may provide a starting point for the development of therapeutic approaches  
655 towards human diseases where *ADGRG6* or myelination is affected. We have identified  
656 groups of structurally-related compounds that can rescue *adgrg6* mutant defects, including  
657 those that are likely to act downstream of the Adgrg6 pathway, and others that are  
658 candidates for interacting with the Adgrg6 receptor. The chemical analysis and structural  
659 comparison of the compounds shown to be putative Adgrg6 receptor agonists will contribute  
660 to the elucidation of the physical properties responsible for ligand binding and will provide  
661 further insight on the underlying mechanism of Adgrg6 signalling.

662

663

## 664 MATERIALS AND METHODS

### 665 Animals

666 Standard zebrafish husbandry methods were employed (Westerfield, 2000). To facilitate  
667 visualisation of in situ hybridisation (ISH) staining patterns, embryos of the *nacre* (*mitfa*<sup>w2/w2</sup>)  
668 strain (ZDB-GENO-990423-18), which lack melanophores (Lister et al., 1999), but are  
669 phenotypically wild-type for expression of *vcanb* and *mbp*, were used as controls for all drug  
670 screening experiments. The wild-type strain used for dose-response experiments was  
671 London Wild Type (LWT). *adgrg6* mutant alleles used were *lau*<sup>tb233c</sup> (formerly *bge*<sup>tb233c</sup>) and  
672 *lau*<sup>fr24</sup> (ZDB-GENE-070117-2161) (Geng et al., 2013; Whitfield et al., 1996), and were raised  
673 on a pigmented background. In all cases shown, mutant embryos are homozygous for the  
674 respective allele. The transgenic strain used for imaging in Fig. 1 and in the Supplemental  
675 movie was *Tg(smud6b:GFP)*, a gift of Robert Knight (Baxendale and Whitfield, 2016). Prior  
676 to treatment, embryos were raised in E3 embryo medium (Westerfield, 2000) at 28.5°C. We  
677 have used the term embryo throughout to refer to zebrafish embryos and larvae from 0–5  
678 days post fertilisation (dpf).

679

### 680 Compound library storage, aliquoting and administration to embryos

681 Chemical compounds from the Tocriscreen Total library (Tocris, 1120 compounds) and The  
682 Spectrum Collection (Microsource Discovery Systems, 2000 compounds) were arrayed in  
683 MultiScreen-Mesh 96-well culture receiver trays (Millipore) in columns 2–11 and diluted to 25  
684 µM in E3 medium for drug screening. Control wells contained either IBMX (3-isobutyl-1-  
685 methylxanthine, Sigma, 50 µM and 100 µM), DMSO (Sigma, 1% in E3) or E3, in columns 1  
686 and 12 (see diagram of the plate layout in Fig. 2). Wild-type (LWT and *nacre*) and  
687 homozygous *adgrg6*<sup>tb233c</sup> mutant embryos were raised to 50 hpf at 28.5°C in E3 medium,  
688 dechorionated manually with forceps, and then incubated at 20°C overnight to slow down  
689 development and facilitate timing of experimental treatments. This regime reduced ear  
690 swelling, but did not reduce otic *vcanb* levels, in mutant embryos. Embryos at the 60 hpf  
691 stage were aliquoted at three embryos per well into MultiScreen-Mesh mesh-bottomed  
692 plates (Millipore) and transferred to the drug plate (receiver tray; see above). Assay plates  
693 were incubated at 28.5°C for 28 hours and the embryos were then transferred to 4%  
694 paraformaldehyde and stored at 4°C overnight. Embryos were bleached according to the  
695 standard protocol (Thisse and Thisse, 2008) and stored at -20°C in 100% methanol until  
696 required for ISH. Hits identified in the primary screen were rescreened using the same  
697 protocol.

698

### 699 Scoring systems for *vcanb* and *mbp* expression

700 To score the efficacy of the drugs in down-regulating *vcanb* mRNA levels, a scoring system  
701 from 0 to 3 was used, with 0 being the score for a very efficient drug (a 'hit') that can  
702 suppress *vcanb* expression back to almost wild-type levels, and 3 the score for a drug that  
703 did not have any effect on *vcanb* mRNA levels expressed in the mutant ear. Scores 1 and 2  
704 were given to drugs that showed an ability to down-regulate *vcanb* expression to some  
705 extent, with 1 given for a stronger down-regulation than 2 (Figure 5.2A). Drugs were then  
706 classified into categories A–E, according to the combined score from the three embryos  
707 treated with each drug (Figure 5.2B). Drugs categorised as A, B or C were considered  
708 successful, and were cherry-picked into new drug assay plates for further testing. Drugs  
709 categorised as D and E were considered to show incomplete or no inhibition of *vcanb*  
710 expression, respectively. Drugs from category F caused severe developmental  
711 abnormalities, heart oedema, brain oedema or death at the end of the treatment and  
712 therefore were characterised as toxic. Category G represented drugs that were potentially  
713 corrosive, as no fish were found in these wells at the end of the treatment, although this  
714 could also have resulted from death of the embryos followed by digestion by  
715 microorganisms, or through experimental error. Drugs that fell into any of the categories D–  
716 G were eliminated from the assay and were not followed further.

717

718 For the *mbp* counter screen (Fig. 4D,E), a score of 3 was used for embryos where *mbp*  
719 mRNA expression was rescued to wild-type levels, a score of 2 for embryos that showed  
720 some *mbp* expression in the PLLg (weaker than wild-type levels) and a score of 1 in cases  
721 where the *mbp* expression was identical to the one seen in untreated *adgrg6<sup>tb233c</sup>* mutants  
722 (i.e. lacking *mbp* expression in the PLLg). The fact that *mbp* expression is not missing  
723 altogether from other areas of the PNS in *adgrg6<sup>tb233c</sup>* mutants allowed us to use a score of 0  
724 in cases where *mbp* expression levels were lower than those typically seen in *adgrg6<sup>tb233c</sup>*  
725 mutants.

726

### 727 **Whole-mount in situ hybridisation analysis of gene expression**

728 Digoxigenin-labelled RNA probes for *vcanb* (Kang et al., 2004) and *mbp* (*mbpa*) (Brösamle  
729 and Halpern, 2002) were prepared as recommended (Roche). Whole-mount ISH was  
730 performed using standard procedures (Thisse and Thisse, 2008), modified for the Biolane  
731 HTI 16V in situ robot (Intavis) and MultiScreen-Mesh mesh-bottomed plates to increase  
732 throughput (Baxendale et al., 2012). Stained embryos were scored manually by at least two  
733 people and any discrepancies between the results were re-analysed.

734

### 735 **Dose-response and LD50 assays**

736 Selected compounds were purchased separately from Sigma (nifedipine and cilnidipine),  
737 Cayman Chemicals (FPL 64176) and Santa Cruz Biotechnology (tracazolate hydrochloride)  
738 for testing in dose-response assays. In order to assess the ear swelling in drug-treated  
739 *adgrg6<sup>tb233c</sup>* mutant embryos, the ear-to-ear width was measured from photographs of live  
740 embryos mounted dorsally, and normalised for the size of the head, using CELLB software  
741 (for details, see Fig. 7—Supplemental file 2).

742

743 An LD50 curve was plotted for the adjusted exposure time (60–110 hpf), using 16 LWT wild-  
744 type embryos (biological replicates) per concentration. To avoid cross-contamination from  
745 dead embryos, each wild-type (LWT) embryo was kept in a separate well of a 96-well plate.  
746 At the end of each treatment, the number of dead embryos (no heartbeat for 10 seconds)  
747 was recorded.

748

#### 749 **Microscopy and photography**

750 Still images of live embryos were taken using an Olympus BX51 microscope, C3030ZOOM  
751 camera and CELLB software, and assembled with Adobe Photoshop. All micrographs are  
752 lateral views with anterior towards the left and dorsal towards the top, unless otherwise  
753 stated. For archiving, fixed and stained embryos were imaged in MultiScreen-Mesh plates  
754 containing 50% glycerol, using a Nikon AZ100 microscope with an automated stage (Prior  
755 Scientific). A compressed in-focus image was generated using the NIS-Elements Extended  
756 Depth of Focus software (Nikon).

757

758 Time-lapse imaging of live embryos was performed on a Zeiss Z.1 light-sheet microscope.  
759 *adgrg6<sup>fr24</sup>* homozygous mutant embryos in a *Tg(smadv6b:GFP)* background were mounted at  
760 60 hpf in 0.7% agarose with anaesthetic (MS-222; 160 µg/ml) and 0.003% PTU (to prevent  
761 pigment formation). Images were taken of a dorsal view of the ear every 5 minutes (200 z-  
762 slices, 1 µm sections). A control time-lapse of a wild-type sibling embryo (images taken at  
763 10-minute intervals) was taken on a separate day. Images were cropped and a subset of z-  
764 slices through the anterior (*adgrg6<sup>fr24</sup>*) and posterior (phenotypically wild-type sibling)  
765 projections were used to make Maximum Intensity Projection movies of projection fusion in  
766 the wild-type sibling and the swollen projections in *adgrg6<sup>fr24</sup>* mutant embryo. The two  
767 movies do not correspond exactly to the same developmental stage.

768

#### 769 **Chemoinformatics analysis and data visualisation**

770 Chemical structures of the library compounds represented as SMILES (Weininger, 1988)  
771 were obtained from vendor catalogues. Molecules were standardised using the wash  
772 procedure of MOE (Chemical Computing Group Inc., Molecular Operating Environment

773 (MOE), Montréal, QC, 2011), accessed through KNIME (Berthold et al., 2009).  
774 Standardised molecules were analysed using RDKit (RDKit: Open-Source Cheminformatics,  
775 <http://www.rdkit.org/>, accessed 06 Nov. 2018) in Python (Python Software Foundation:  
776 Python language reference, version 3, <https://www.python.org/>, accessed 06 Nov. 2018).  
777 Morgan fingerprints of radius 2 (equivalent to ECFP4 (Rogers and Hahn, 2010)) were  
778 computed for each compound. Compound similarity was calculated using the Tanimoto  
779 coefficient (Willett et al., 1998) of the fingerprints using the scikit-learn library (Pedregosa et  
780 al., 2011). Based on the similarity matrix between all compound pairs, a dendrogram was  
781 obtained using the SciPy library (SciPy: Open Source Scientific Tools for Python,  
782 <http://www.scipy.org/>, accessed 06 Nov. 2018). The polar scatterplot was created using the  
783 matplotlib library (printed version) (Hunter, 2007) and plotly (interactive version) (Plotly  
784 Technologies Inc, Collaborative data science, Plotly, Montréal, QC, 2015.). To identify  
785 duplicated molecules, the InChIKey (Heller et al., 2015) was computed for each compound  
786 and all pairs of compounds were checked for identical InChIKeys. To create the compound  
787 network, the similarity matrix computed for the dendrogram was transformed into an  
788 adjacency matrix using a threshold value of 0.5, i.e. compounds with a similarity value over  
789 0.5 are connected with an edge. The network visualisation was created using Cytoscape  
790 (Shannon et al., 2003).

791

## 792 **Statistical analysis**

793 Statistical analyses were performed using GraphPad Prism version 7 for Mac, GraphPad  
794 Software, La Jolla California USA, [www.graphpad.com](http://www.graphpad.com).

795

## 796 **Acknowledgements**

797 We thank a number of undergraduate and MSc project students who contributed to early  
798 stages of the primary screens described here, especially D. Butler, who helped with  
799 establishing the *mbp* secondary screening protocol. F-S. Geng tested the initial screening  
800 protocol on wild-type embryos. We thank J-P. Ashton, S. Burbridge, M. Marzo and N. van  
801 Hateren for technical support, D. Lambert for discussion and the Sheffield aquarium staff for  
802 expert care of the zebrafish.

803

## 804 **Ethics statement**

805 All animal work was performed under licence from the UK Home Office.

806

## 807 **Funding**

808 This work was funded by grants from the BBSRC (BB/J003050/1; BB/M01021X/1) to TTW  
809 and SB). ED was supported by a PhD studentship from the University of Sheffield (314420);



810 AA was supported by a BBSRC White Rose National Productivity Investment Fund Doctoral  
811 Training Award (BB/R50581X/1); LA was supported by a Wellcome Trust VIP award  
812 (085441). Light-sheet imaging was carried out in the Sheffield Wolfson Light Microscopy  
813 Facility, supported by a BBSRC ALERT14 award (BB/M012522/1) to TTW and SB. The  
814 Sheffield Zebrafish Screening Unit and zebrafish aquaria were supported by grants from the  
815 MRC (G0802527, G0700091). The research leading to these results has received funding  
816 from the European Union's Seventh Framework Programme (FP7/2007–2013) under Grant  
817 agreement no. 612347 to VJG.

818

#### 819 **Author contributions**

820 Designed the study: TTW, SB

821 Performed the experiments SB, ED, AA, CJH, DB, LA

822 Wrote the manuscript: TTW, SB, ED

823 Analysed the data: SB, ED, TTW

824 Chemoinformatics analysis: AVL, VJG

825 Supervision: TW, SB, GW

826

827

828 **Tables and Figures**

829

830 **Table 1. List of the 41 hit compounds that rescued the expression of both *vcanb* and *mbp* in**  
831 ***adgrg6<sup>tb233c</sup>* mutants, thus representing putative Adgrg6 pathway modulators**

832 The table includes the plate and well ID, along with known activities and the average score from nine  
833 *adgrg6<sup>tb233c</sup>* embryos in the *vcanb* assay, from six *adgrg6<sup>tb233c</sup>* embryos in the *mbp* assay and from  
834 three *adgrg6<sup>fr24</sup>* embryos in the *fr24* assay. Grey shading indicates compounds presumed to interact  
835 with Adgrg6 receptor directly, while yellow shading indicates compounds presumed to be downstream  
836 effectors of the pathway. Abbreviations: DE, dead embryos; ND, no data; S, Spectrum; T, Tocris.

837 \*Note that cilnidipine can rescue *fr24* at 40  $\mu$ M (data not shown).

838

839

| #  | Plate | Well | Compound name                             | Known activity                                                                          | vcanb score | mbp score | fr24 score |
|----|-------|------|-------------------------------------------|-----------------------------------------------------------------------------------------|-------------|-----------|------------|
| 1  | S18   | C09  | CARAPIN-8(9)-ENE                          | undetermined                                                                            | 0.00        | 8.50      | 9.00       |
| 2  | S25   | D08  | 3-ISOBUTYL-1-METHYLXANTHINE (IBMX)        | phosphodiesterase inhibitor, non-selective adenosine receptor antagonist                | 2.00        | 8.50      | 9.00       |
| 3  | S17   | F05  | DEOXYGEDUNIN                              | neuroprotective                                                                         | 2.00        | 8.00      | 9.00       |
| 4  | S23   | F10  | DIHYDROFISSINOLIDE                        | undetermined                                                                            | 2.67        | 7.50      | 9.00       |
| 5  | S04   | B02  | IVERMECTIN                                | antiparasitic                                                                           | 2.33        | 7.00      | 9.00       |
| 6  | T01   | F06  | SC-10                                     | protein kinase C activator, NMDA receptor activator                                     | 5.67        | 6.50      | 9.00       |
| 7  | T01   | H11  | 1,3-DIPROPYL-8-PHENYLXANTHINE             | Selective adenosine A1 receptor antagonist                                              | 3.33        | 6.50      | 9.00       |
| 8  | S17   | E02  | 3-DEOXO-3BETA-ACETOXYDEOXYDIHYDROGEDUNIN  | undetermined                                                                            | 0.00        | 6.50      | 9.00       |
| 9  | T11   | F07  | CILNIDIPINE*                              | dihydropyridine N- and L-type Ca <sup>2+</sup> channel blocker                          | 2.00        | 6.50      | 9.00       |
| 10 | S13   | F03  | AMIODARONE HYDROCHLORIDE                  | coronary vasodilator, Ca <sup>2+</sup> channel blocker                                  | 5.00        | 6.50      | 9.00       |
| 11 | S06   | E02  | HYDROCORTISONE HEMISUCCINATE              | glucocorticoid                                                                          | 3.67        | 6.00      | 9.00       |
| 12 | T01   | C04  | (RS)-(TETRAZOL-5-YL)GLYCINE               | highly potent NMDA receptor agonist                                                     | 3.00        | 5.00      | 9.00       |
| 13 | S02   | E05  | LOMEFLOXACIN HYDROCHLORIDE                | antibacterial                                                                           | 5.33        | 5.00      | 9.00       |
| 14 | S13   | E04  | ETHAMIVAN                                 | CNS & respiratory stimulant                                                             | 4.67        | 5.00      | 9.00       |
| 15 | T08   | B04  | CGS 15943                                 | potent adenosine receptor antagonist                                                    | 5.33        | 4.50      | 9.00       |
| 16 | S13   | E09  | ASTEMIZOLE                                | H1 antihistamine (nonsedating)                                                          | 4.67        | 4.50      | 9.00       |
| 17 | T02   | A09  | SKF 91488 DIHYDROCHLORIDE                 | histamine N-methyltransferase inhibitor                                                 | 3.00        | 4.00      | 9.00       |
| 18 | S25   | F05  | 11ALPHA-HYDROXYPROGESTERONE HEMISUCCINATE | glucocorticoid                                                                          | 2.67        | 4.00      | 9.00       |
| 19 | T14   | A07  | EFONIDIPINE HYDROCHLORIDE MONOETHANOLATE  | dihydropyridine L-type and T-type Ca <sup>2+</sup> channel blocker                      | 3.67        | 4.00      | 9.00       |
| 20 | T05   | C09  | NIFEDIPINE                                | dihydropyridine L-type Ca <sup>2+</sup> channel blocker                                 | 4.33        | 7.00      | 8.00       |
| 21 | T05   | E08  | CGP 37157                                 | antagonist of mitochondrial Na <sup>+</sup> /Ca <sup>2+</sup> exchange                  | 3.67        | 6.50      | 8.00       |
| 22 | S05   | D03  | DANAZOL                                   | anterior pituitary suppressant, anti-estrogenic                                         | 1.00        | 5.00      | 8.00       |
| 23 | S18   | H09  | XANTHYLETIN                               | undetermined                                                                            | 1.00        | 4.50      | 8.00       |
| 24 | S18   | A06  | FERULIC ACID                              | antineoplastic, choleric, food preservative                                             | 3.67        | 4.00      | 8.00       |
| 25 | S18   | F02  | ALPHA-DIHYDROGEDUNOL                      | undetermined                                                                            | 2.33        | 4.00      | 8.00       |
| 26 | T05   | F04  | (S)-(+)-NIGULDIPINE HYDROCHLORIDE         | dihydropyridine L-type Ca <sup>2+</sup> channel blocker, $\alpha$ 1 antagonist          | 3.67        | 5.00      | 7.00       |
| 27 | T07   | F02  | TRACAZOLATE HYDROCHLORIDE                 | subtype-selective GABA <sub>A</sub> allosteric modulator                                | 2.33        | 4.50      | 7.00       |
| 28 | S10   | E02  | NIMODIPINE                                | dihydropyridine L-type Ca <sup>2+</sup> channel blocker                                 | 0.33        | 7.00      | 6.00       |
| 29 | S17   | E06  | 3BETA-ACETOXYDEOXODIHYDROGEDUNIN          | undetermined                                                                            | 2.00        | 4.50      | 5.00       |
| 30 | S17   | F02  | DIHYDROGEDUNIN                            | undetermined                                                                            | 1.67        | 5.00      | 2.00       |
| 31 | S22   | F09  | TANGERITIN                                | undetermined                                                                            | 1.33        | 5.50      | 1.00       |
| 32 | S10   | F07  | COLFORSIN                                 | adenylate cyclase activator, antiglaucoma, hypotensive, vasodilator                     | 0.00        | 9.00      | 0.00       |
| 33 | T04   | G02  | IMOLOXAN HYDROCHLORIDE                    | selective $\alpha_{2B}$ -adrenoceptor antagonist.                                       | 0.67        | 9.00      | ND         |
| 34 | S24   | C03  | 3ALPHA-ACETOXYDIHYDRODEOXYGEDUNIN         | undetermined                                                                            | 0.33        | 8.50      | DE         |
| 35 | S11   | E02  | EZETIMIBE                                 | antihyperlipidemic (sterol absorption inhibitor)                                        | 2.00        | 7.50      | 0.00       |
| 36 | S10   | E06  | NITRENDIPINE                              | dihydropyridine L-type Ca <sup>2+</sup> channel blocker                                 | 1.33        | 7.00      | ND         |
| 37 | S11   | E08  | ROSUVASTATIN CALCIUM                      | antihyperlipidemic                                                                      | 0.00        | 6.00      | 0.00       |
| 38 | S22   | C07  | DEMETHYLNIBILETIN                         | undetermined                                                                            | 0.00        | 6.00      | 0.00       |
| 39 | S22   | G11  | HEXAMETHYLQUERCETAGETIN                   | undetermined                                                                            | 0.00        | 5.50      | DE         |
| 40 | S22   | F08  | NOBILETIN                                 | matrix metalloproteinase inhibitor, antineoplastic, anti-ERK, NF- $\kappa$ B suppressor | 0.00        | 5.00      | DE         |
| 41 | S12   | H07  | PREGNENOLONE SUCCINATE                    | glucocorticoid, antiinflammatory                                                        | 4.67        | 4.00      | DE         |

840

841

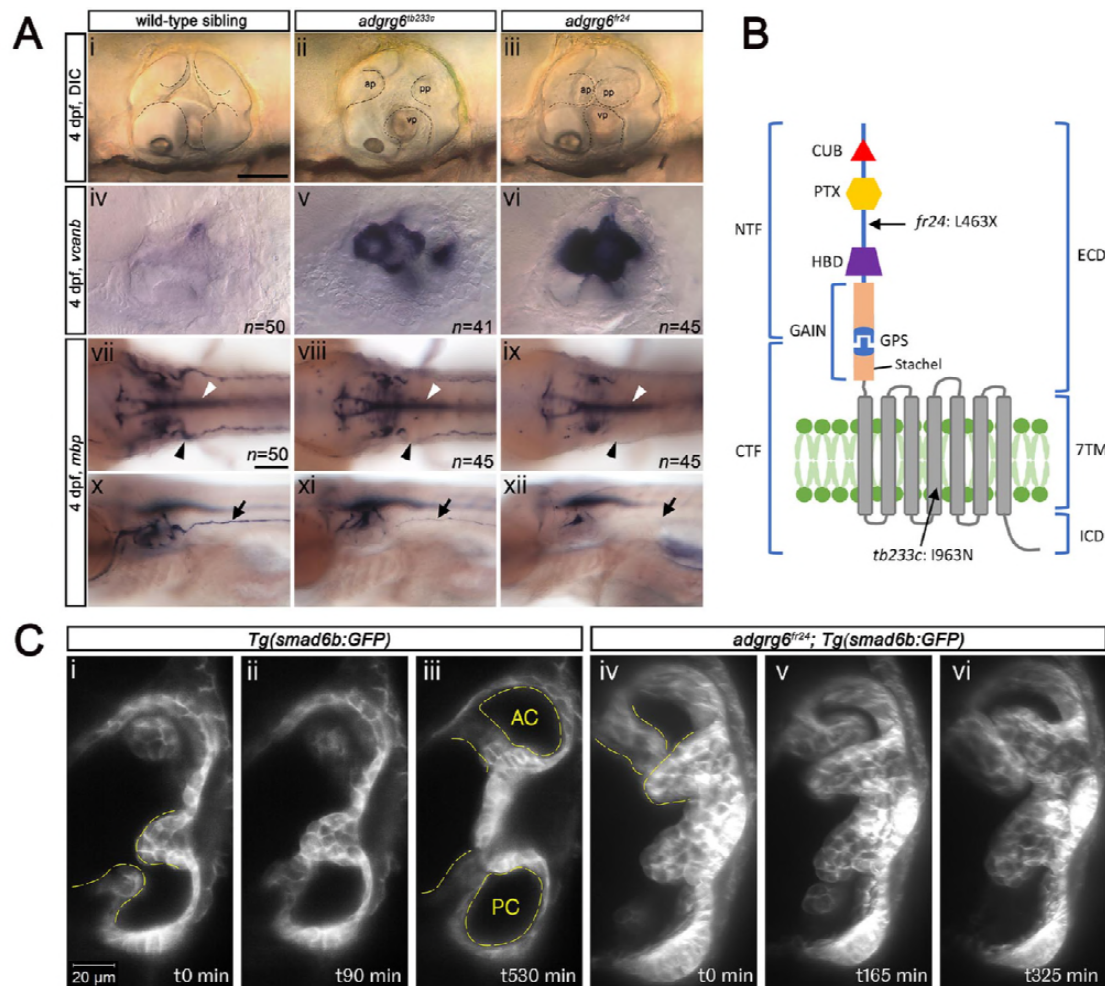

842

843 **Figure 1. Comparison of *adgrg6* mutant allele phenotypes in the inner ear and peripheral**  
 844 **nerve system**

845 **A. (i–iii)** Live images of 4 dpf otic vesicles, lateral view. (i) wild-type sibling, (ii) *adgrg6*<sup>tb233c</sup>, (iii)  
 846 *adgrg6*<sup>fr24</sup> showing the swollen, unfused projections in the mutant otic vesicles in ii and iii compared  
 847 with the fused pillars in the wild-type ear. **(iv–vi)** ISH with *vcanb* at 4 dpf. (iv) Wild-type sibling, (v)  
 848 *adgrg6*<sup>tb233c</sup>, (vi) *adgrg6*<sup>fr24</sup> mutant ears showing overexpression of *vcanb* in the unfused projections.  
 849 Stronger staining is seen in the stronger allele, *fr24*. **(vii–xi)** ISH with *mbp* at 4dpf, (vii–ix) dorsal  
 850 views, (x–xii) lateral views. (vii, x) wild-type sibling, (viii, xi) *adgrg6*<sup>tb233c</sup>, (ix, xii) *adgrg6*<sup>fr24</sup> showing  
 851 complex staining patterns in the PNS (black arrows and arrowheads) and CNS (white arrowheads).  
 852 *mbp* staining in the PLLg is absent in both *tb233c* and *fr24* alleles (black arrowheads); staining in the  
 853 posterior lateral line nerve is variable in *tb233c* mutants and absent in *fr24* mutants (black arrows). **B.**  
 854 Schematic diagram showing the structure of the *Adgrg6* receptor and the positions of the predicted  
 855 amino acid changes for the two *adgrg6* mutant alleles used in this study. **C.** Light-sheet microscope  
 856 images using a *Tg(smadv6b:GFP)* line, showing a dorsal view of the ear (anterior to the top). (i–iii)  
 857 Wild-type sibling showing anterior and posterior pillars formed from fused projections (iii). Note that  
 858 images are flipped horizontally from the originals for ease of comparison (see Supplementary Video 1;  
 859 t0 on the stills corresponds to ~100 mins into the video). (iv–vi) still images from a time-lapse movie  
 860 of *adgrg6*<sup>fr24</sup> mutant with unfused projections that rotate around each other (see Supplementary Video  
 861 2). Abbreviations: AC, lumen of anterior semicircular canal; ap, anterior projection; CTF, carboxy-  
 862 terminal fragment; CUB, Complement C1r/C1s, Uegf, BMP1 domain; ECD, extracellular domain;  
 863 GAIN, GPCR auto-proteolysis domain; GPS, GPCR proteolytic site; HBD, hormone binding domain;  
 864 ICD, intracellular domain; NTF, amino-terminal fragment; PC, lumen of posterior semicircular canal;  
 865 pp, posterior projection; PTX, Pentraxin domain; vp, ventral projection; 7TM, 7-transmembrane  
 866 domain. Scale bars: 50  $\mu$ m in Ai, for Aii–vi; 100  $\mu$ m in Avii, for Aviii–xii; 20  $\mu$ m in Ci, for Cii–vi.

867

868 **Supplementary Video 1**

869 Light-sheet microscope time-lapse movie using the *Tg(smad6b:GFP)* line, which marks cell  
870 membranes of the otic epithelium. Dorsal view (anterior to top) of the left inner ear of a phenotypically  
871 wild-type sibling embryo showing the anterior, lateral and posterior projections (the anterior projection  
872 is partially out of view). In the movie, the posterior projection grows and meets the posterior bulge  
873 from the lateral projection. The projection and bulge meet, fuse and resolve to form a pillar over 900  
874 minutes (approximately 55 hpf–70 hpf). The movie shows a Maximum Intensity Projection of selected  
875 z-slices spanning approximately 6  $\mu\text{m}$ , captured every 10 minutes, and played back at 10 frames per  
876 second. Selected stills from the movie, flipped horizontally to match the panels showing the mutant  
877 ear, are shown in Fig. 1C.

878 **Supplementary Video 2**

879 Light-sheet microscope time-lapse movie using the *Tg(smad6b:GFP)* line. Dorsal view of the right  
880 inner ear of an *adgrg6<sup>fr24</sup>* mutant embryo showing anterior, lateral and posterior projections (the  
881 posterior projection is partially out of view). In the movie, the anterior projection and anterior bulge  
882 from the lateral projection touch, but continue to grow past one another. The unfused projections  
883 rotate around each other over 900 minutes (approximately 60 hpf–75 hpf). The movie shows a  
884 Maximum Intensity Projection of selected z-slices spanning approximately 20  $\mu\text{m}$ , captured every 5  
885 minutes, and played back at 20 frames per second. Selected stills from the movie are shown in Fig.  
886 1C.

887

888

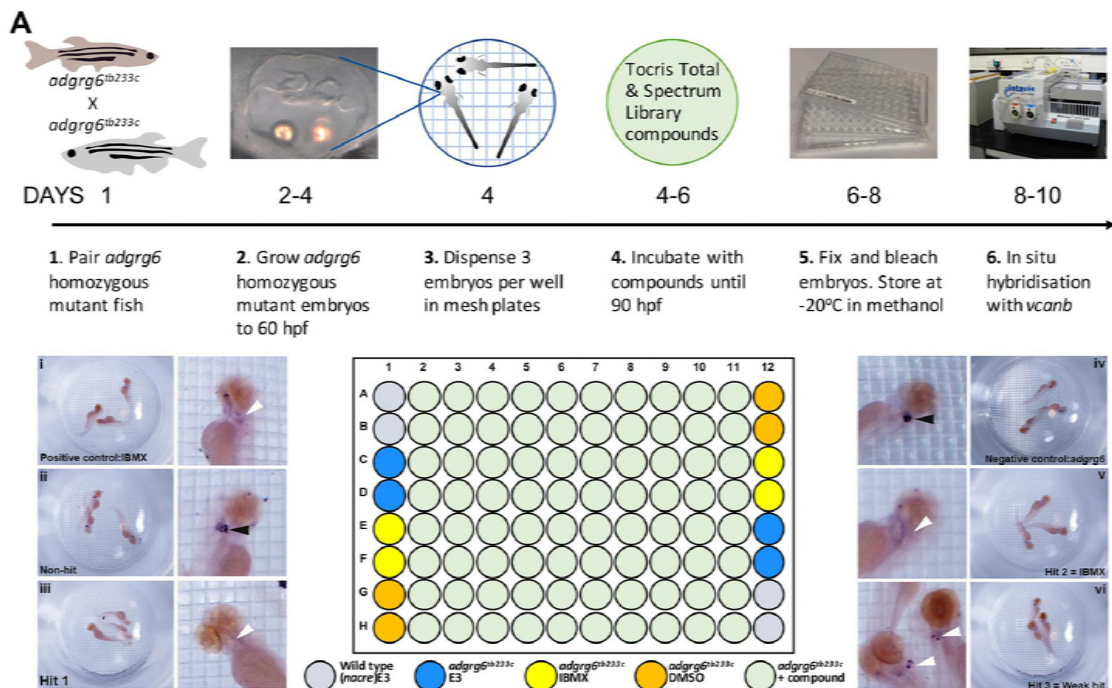

889  
890

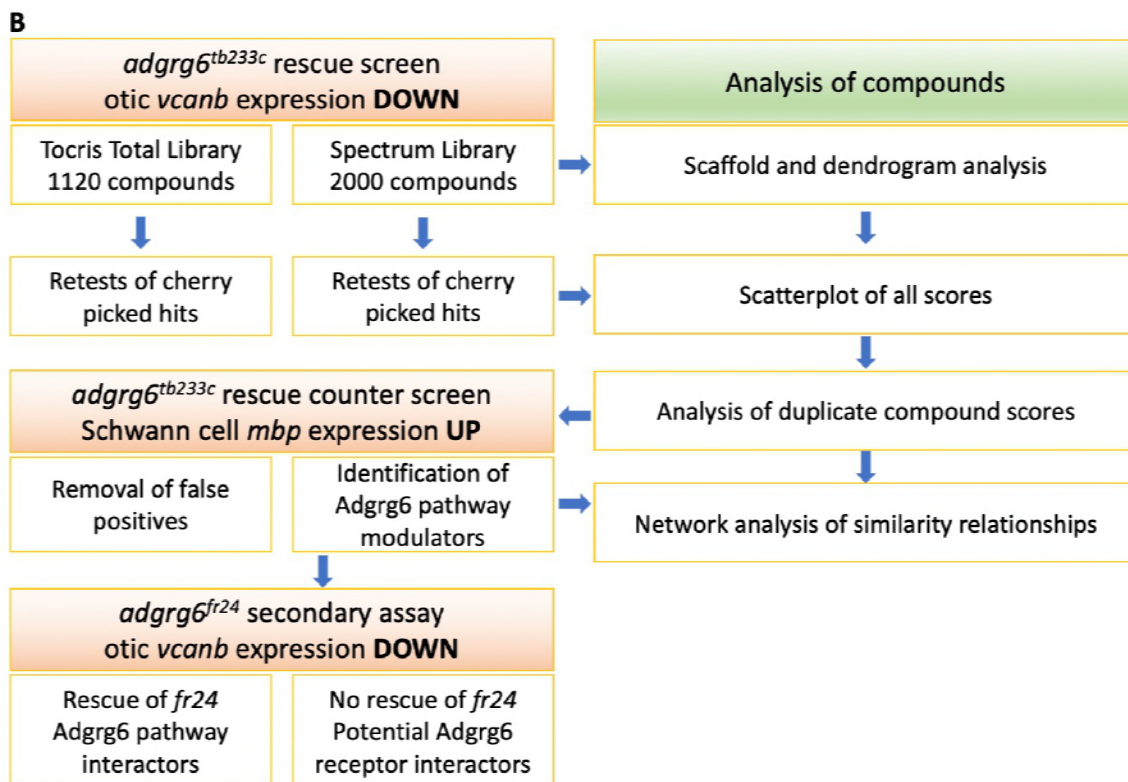

891  
892

**Figure 2. Overview of the screening assay protocol and strategy**

893 **A.** Schematic of the screening assay protocol. Homozygous adult *adgrg6*<sup>tb233c</sup> mutant fish were  
 894 paired to raise large numbers of *adgrg6*<sup>tb233c</sup> mutant embryos. Embryos were grown until 60 hpf,  
 895 when the lateral, anterior and posterior epithelial projections in the inner ear are evident. Three  
 896 embryos were aliquoted into each well of a mesh-bottomed multiwell plate in E3 medium. The mesh-

897 bottomed plate was then transferred to the drug plate containing control compounds as shown in the  
898 plate layout and library compounds at 25  $\mu$ M in 250  $\mu$ L of E3 embryo medium. Plates were incubated  
899 at 28°C until 90 hpf. The mesh-bottomed plate and embryos were then transferred to 4% PFA for  
900 fixation (4°C, overnight) and then processed for ISH to *vcanb*. Micrographs show a selection of  
901 typical results. Treatment with 100  $\mu$ M IBMX (positive control, top) results in loss (rescue) of otic  
902 *vcanb* expression (white arrowhead). Strong otic *vcanb* expression (black arrowhead) is evident in  
903 embryos where the compound had no effect (non-hit) and in negative control wells (not shown). Note  
904 the spot of stain in each embryo, marking expression in the otic vesicle. Three examples are shown  
905 of wells where compounds were scored as a hit; one of these (Hit 2) was IBMX, represented in the  
906 Spectrum collection. **B.** Pipeline of the compound screening strategy and chemoinformatics analysis.  
907 The left hand side describes the flow of experimental work and the right hand side describes the  
908 complementary chemoinformatics processes. For details, see the text.  
909

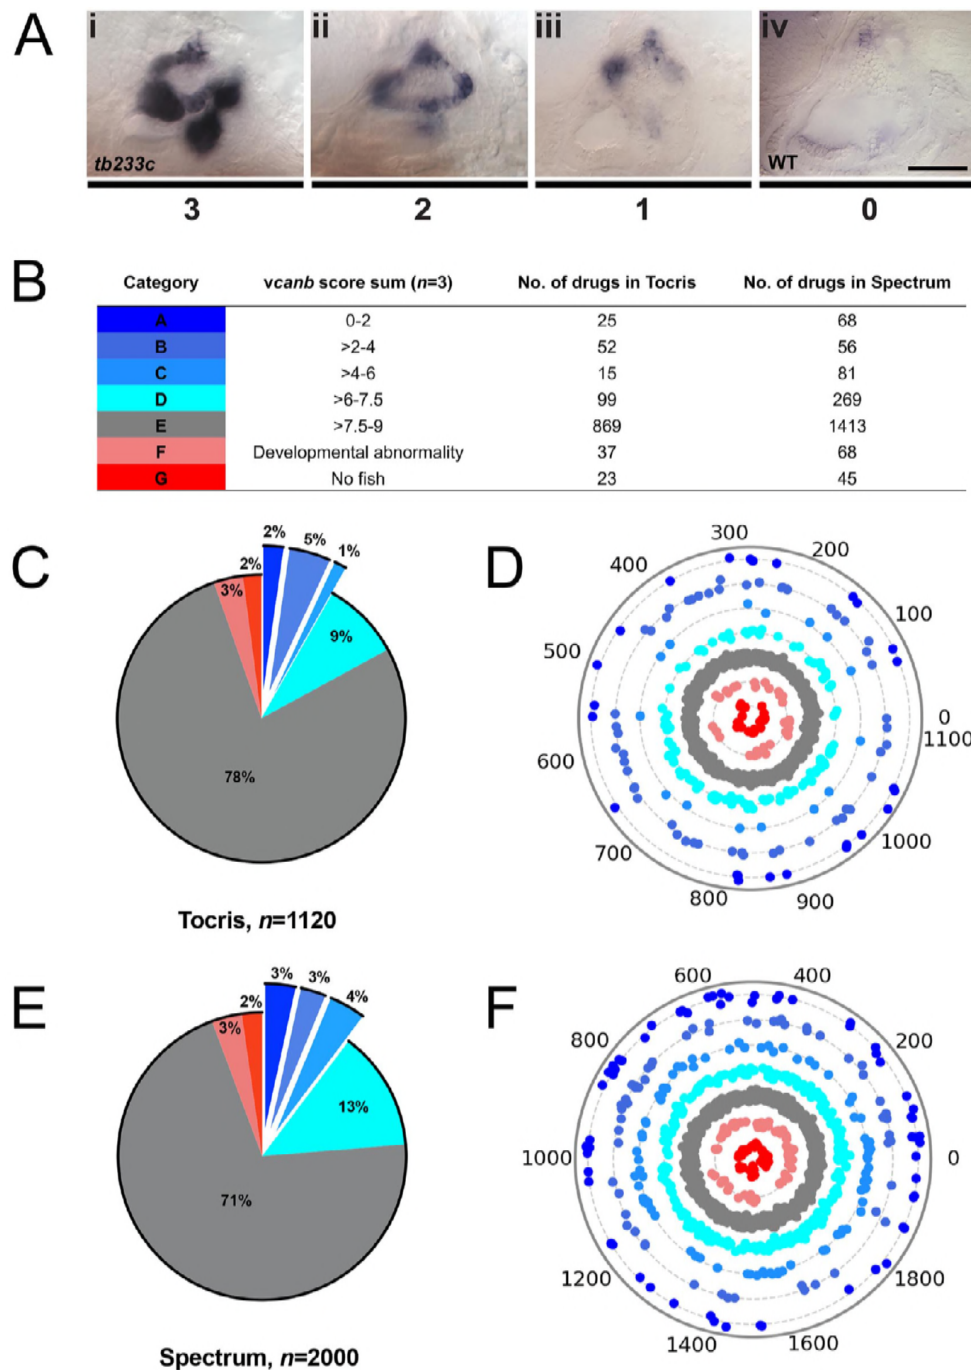

**Figure 3. A primary drug screen identified 92 (Tocris) and 205 (Spectrum) putative hit compounds able to down-regulate *vcanb* mRNA expression in *adgr6*<sup>tb233c</sup> mutants**

910  
911  
912

913 **A.** Scoring system used to assess *vcanb* mRNA expression levels in the inner ear of *adgr6*<sup>tb233c</sup>  
914 embryos after treatment. (Ai) *vcanb* mRNA expression in the untreated/DMSO-treated *adgr6*<sup>tb233c</sup>  
915 mutant ear (score 3). Scores 2 (Aii) and 1 (Aiii) were given to embryos that showed reduced *vcanb*  
916 mRNA expression to some extent, with 1 given for a stronger down-regulation than 2. (Aiv) Score 0  
917 was given to embryos where *vcanb* mRNA levels were equivalent to wild-type levels. **B.** Compounds  
918 were categorised A–G according to the total *vcanb* score from the three embryos treated. Colours for  
919 each category correspond to the colours used in panels C–F. **C,E.** Pie charts showing the  
920 distribution of compounds from Tocris (C) and Spectrum (E) libraries in categories A–G. **D,F.**  
921 Compounds from Tocris and Spectrum libraries were ordered according to similarities in their  
922 chemical structure and presented as individual dots in polar scatterplots in D and F, respectively, with  
923 jitter (noise) introduced to improve visualisation. Spectrum library results have a higher level of  
924 clustering as expected from the scaffold analyses. Scale bar: 50  $\mu$ m.

925



926

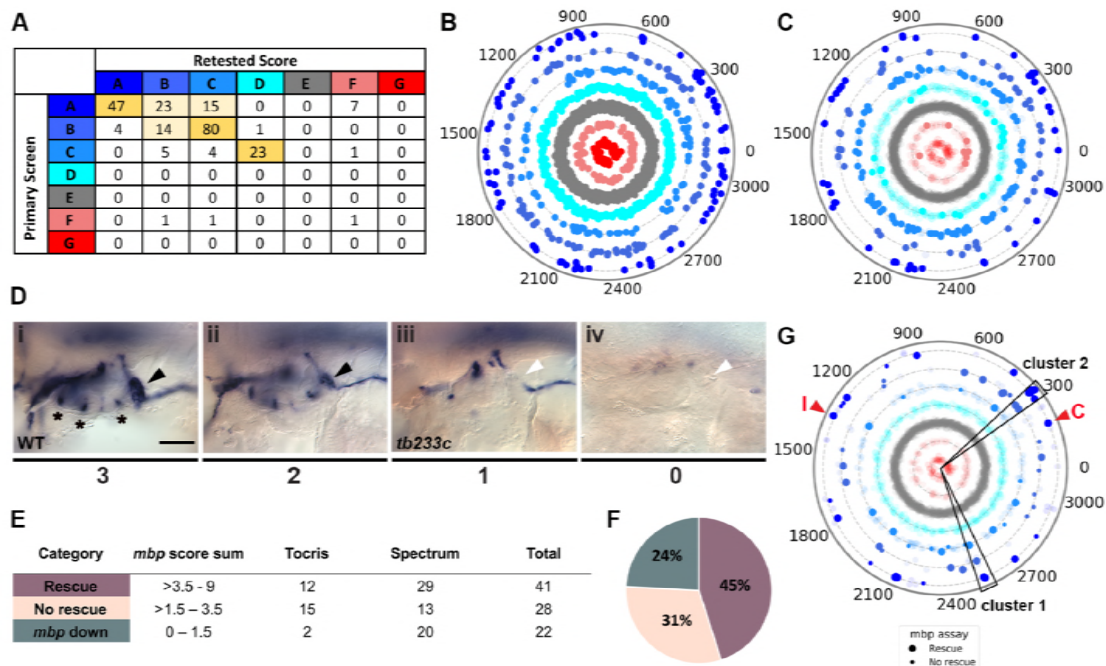

927  
928  
929

**Figure 4. Retesting and counter screen for *mbp* expression reveals chemical clustering of hit compounds**

930 **A.** Table listing the number of compounds in each scoring category after screening 9 embryos,  
931 compared to the original score after treating 3 embryos. Category thresholds and corresponding  
932 colours are the same as in Figure 3. **B.** Compounds from both libraries are represented as individual  
933 dots in the same polar scatterplot (3120 compounds in total;  
934 [https://adlvdl.github.io/visualizations/polar\\_scatterplot\\_whitfield\\_vcanb.html](https://adlvdl.github.io/visualizations/polar_scatterplot_whitfield_vcanb.html)). Compounds were  
935 ordered according to similarities in their chemical structure and placed in concentric circles according  
936 to the category A–G they were assigned to after the primary screen, with jitter (noise) introduced to  
937 improve visualisation. **C.** Polar scatter plot of the 91 hit compounds that passed the first retest and  
938 were followed up with *mbp* counter screens; previous scores for the compounds not followed are  
939 faded. **D–G.** *mbp* scoring system and classification of the compounds. **D.** Scoring system used to  
940 assess *mbp* mRNA expression levels in the PLLg of *adgrg6*<sup>tb233c</sup> embryos after treatment. (Di) A  
941 score of 3 was given to embryos where *mbp* mRNA expression was similar to wild-type levels. Black  
942 arrowhead: *mbp* expression in PLLg; asterisks mark expression near the three cristae of the ear. (Dii)  
943 A score of 2 was given to embryos that showed *mbp* expression in the PLLg, but this was weaker  
944 than 3. (Diii) A score of 1 was given to embryos with *mbp* expression identical to the one seen in  
945 untreated *adgrg6*<sup>tb233c</sup> mutants (absence of *mbp* expression in PLLg; white arrowhead). (Div) A score  
946 of 0 was used to indicate embryos where *mbp* mRNA expression was absent from the PLLg, but also  
947 reduced from the Schwann cells of the posterior and anterior lateral line. **E.** Compounds were  
948 categorised according to the *mbp* score from six embryos (average of the total score from three  
949 embryos) and grouped into compounds able to rescue *mbp* expression (score >3.5–9) and unable to  
950 rescue *mbp* expression (>1.5–3.5). A third class of compounds down-regulated both *vcanb* and *mbp*  
951 (score 0–1.5) and were not followed further. **F.** Distribution of the compounds in the different rescue  
952 categories after the *mbp* counter screen. **G.** Polar scatter plot of the final 68 hit compounds (non-  
953 faded) after *mbp* counter screens. Bigger dots represent compounds that rescued *mbp* expression,  
954 whereas smaller dots correspond to the compounds that did not rescue *mbp* expression; compounds  
955 that downregulated *mbp* expression, or were not followed, are faded. Wedges on the scatter plot  
956 delineate the two clusters of compounds with similar structures for which some hits were followed up  
957 in further analysis (see text). The positions of IBMX (I) and colforsin (C) are indicated (red  
958 arrowheads). Scale bar: 50  $\mu$ m.

959

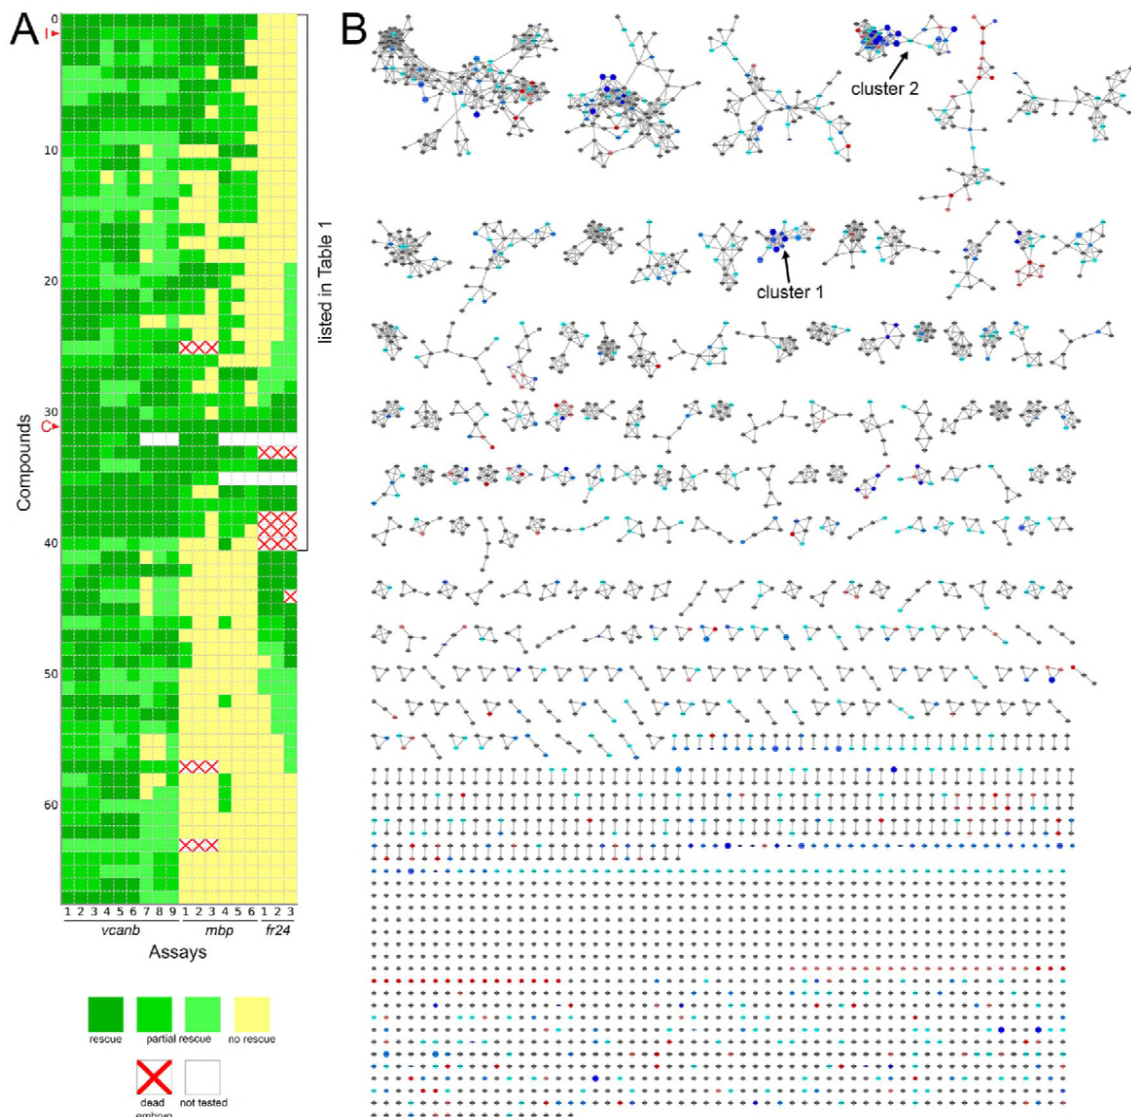

960

961 **Figure 5. Heatmap of the assay results and network analysis for 68 compounds identified in**  
 962 ***vcanb* screen**

963 **A.** Heatmap of the assay results for each of the 68 hit compounds. Each box represents an embryo  
 964 screened in each of the three assays (*vcanb*, *mbp* and *fr24*) as listed at the bottom of the heatmap.  
 965 Each line corresponds to a different compound. Colours correspond to the scoring system used for  
 966 each screen (0–3), with dark green, a strong hit (rescue of the mutant phenotype); yellow, no rescue;  
 967 white, no data; white with red cross, toxic. Compounds were sorted based on the average score for  
 968 *mbp* with strongest rescue at the top. The bracket indicates the 41 compounds that rescued both  
 969 *vcanb* and *mbp* expression in *adgrg6<sup>tb233c</sup>* mutants and thus represent putative Adgrg6 pathway  
 970 modulators. Abbreviations: C, colforsin; I, IBMX. **B.** Network analysis based on structural similarity,  
 971 showing all 3120 compounds from the two libraries. Compounds that rescued *mbp* expression are  
 972 shown as larger nodes, while compounds that did not rescue *mbp* expression are shown as smaller  
 973 nodes. The colours used for compounds/nodes correspond to categories A–G (as indicated in Figure  
 974 3) and the two clusters of structurally similar compounds highlighted in Figure 4 are also shown here.  
 975 An interactive version of this figure can be accessed and mined at:  
 976 [https://adlvdl.github.io/visualizations/network\\_whitfield\\_vcanb\\_mbp/index.html](https://adlvdl.github.io/visualizations/network_whitfield_vcanb_mbp/index.html).

977



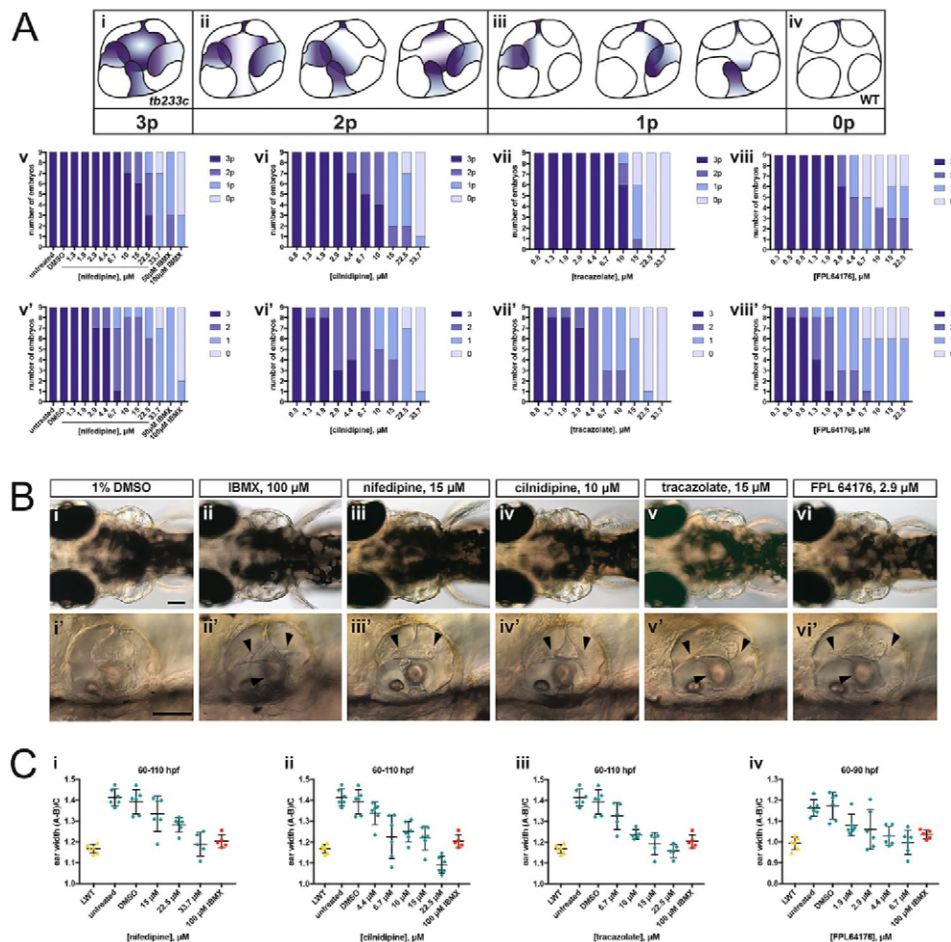

995

996 **Figure 7. Selected hit compounds rescue the *adgrg6*<sup>tb233c</sup> mutant ear phenotype in a dose-**  
 997 **dependent manner**

998 **A.** *adgrg6*<sup>tb233c</sup> homozygous embryos were exposed to a 1.5-fold dilution series of concentrations  
 999 (ranging from 0.3  $\mu$ M to 33.7  $\mu$ M), tailored to the toxicity of nifedipine, cilnidipine, trazacolate  
 1000 hydrochloride and FPL 64176. IBMX (50  $\mu$ M and 100  $\mu$ M) was used as a positive control; DMSO  
 1001 (1%) was used as a negative control. Embryos were treated between 60–110 hpf prior to fixation and  
 1002 analysis for *vcanb* expression by whole-mount in situ hybridisation. (Ai–iv) Scoring system used to  
 1003 assess the intensity of *vcanb* ISH staining. (Av–viii) Chart bars showing the number of embryos that  
 1004 scored 0p, 1p, 2p, or 3p. (Av'–viii') Chart bars showing the number of embryos that scored 0, 1, 2, or  
 1005 3. **B.** (i–vi) Live dorsal DIC images of 110 hpf (or 90 hpf for FPL 64176-treated embryos)  
 1006 *adgrg6*<sup>tb233c</sup> mutants treated with the compounds shown above. (i'–vi') Lateral views of the inner ear  
 1007 of the embryos depicted in i–vi, showing rescue of pillar fusion (arrowheads) following treatment. **C.**  
 1008 Measurements of the ear-to-ear width were taken from live embryos mounted dorsally and  
 1009 photographed at a focal plane that highlighted the largest visible dimensions (see Fig. 7—  
 1010 Supplemental file 2). Error bars represent the mean  $\pm$  standard deviation. Combined data from two  
 1011 experimental repeats. Scale bars: 50  $\mu$ m.  
 1012

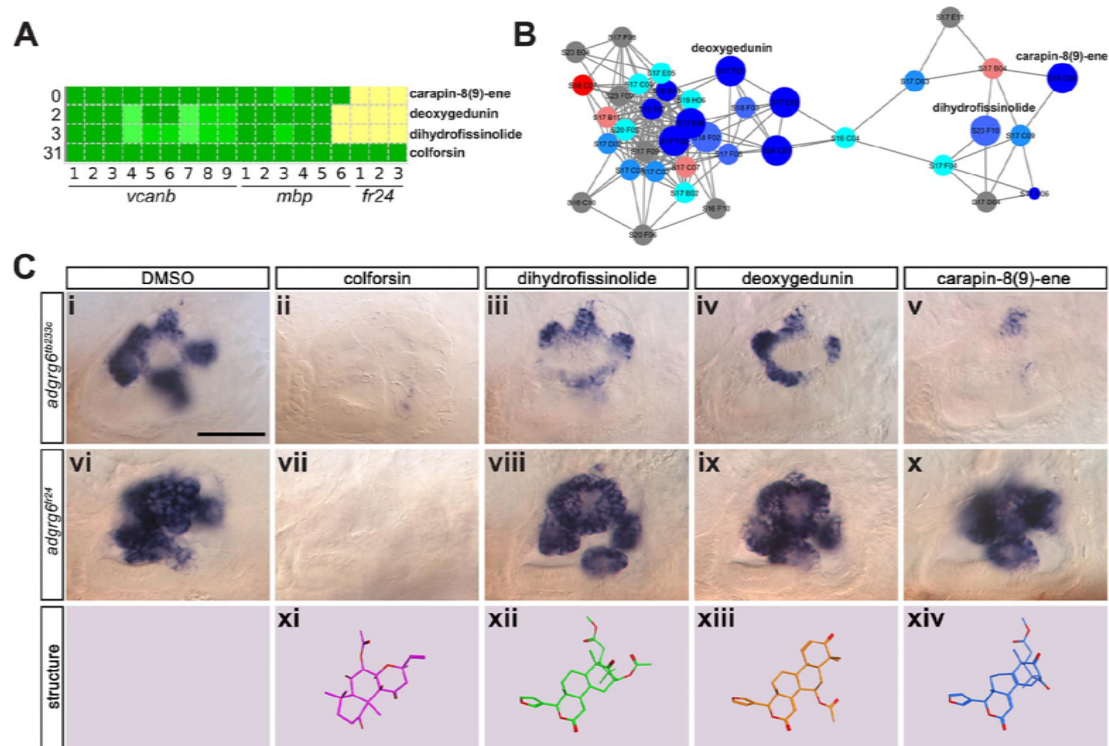

1013

1014

1015

**Figure 8. Assay for rescue of the *fr24* strong allele distinguishes compounds likely to rescue downstream, or at the level of, the Adgrg6 receptor**

1016

1017

1018

1019

1020

1021

1022

1023

1024

1025

1026

1027

1028

**A.** Section of the heatmap in Fig. 5A showing the results for colforsin, dihydrofissinolide, deoxygedunin and carapin-8(9)-ene. **B.** Enlargement of the cluster containing gedunin-related compounds (cluster 2 in Figs. 4G and 5B), highlighting deoxygedunin, dihydrofissinolide and carapin-8(9)-ene. Compounds that rescued *mbp* expression are shown as larger nodes, while compounds that did not rescue *mbp* expression are shown as smaller nodes. **C.** (i–x) Lateral images of the inner ear at 4 dpf stained for *vcanb*. (i) *adgrg6<sup>tb233c</sup>/DMSO* mutant control. (ii – v) Treatment of *adgrg6<sup>tb233c</sup>* mutants with compounds labelled above was able to rescue the *tb233c* mutant ear phenotype at variable degrees. (vi) *adgrg6<sup>fr24</sup>/DMSO* mutant control. (vii–x) Treatment of *adgrg6<sup>fr24</sup>* mutants with colforsin rescued otic *vcanb* expression in *fr24* allele, whereas treatment with dihydrofissinolide, deoxygedunin and carapin-8(9)-ene was unable to rescue the *fr24* ear phenotype. (xi–xiv) 3D representation of the chemical structure of the four compounds tested. Note the structural similarity between deoxygedunin, dihydrofissinolide and carapin-8(9)-ene. Scale bar: 50  $\mu$ m.

1029 **Supplementary figures**

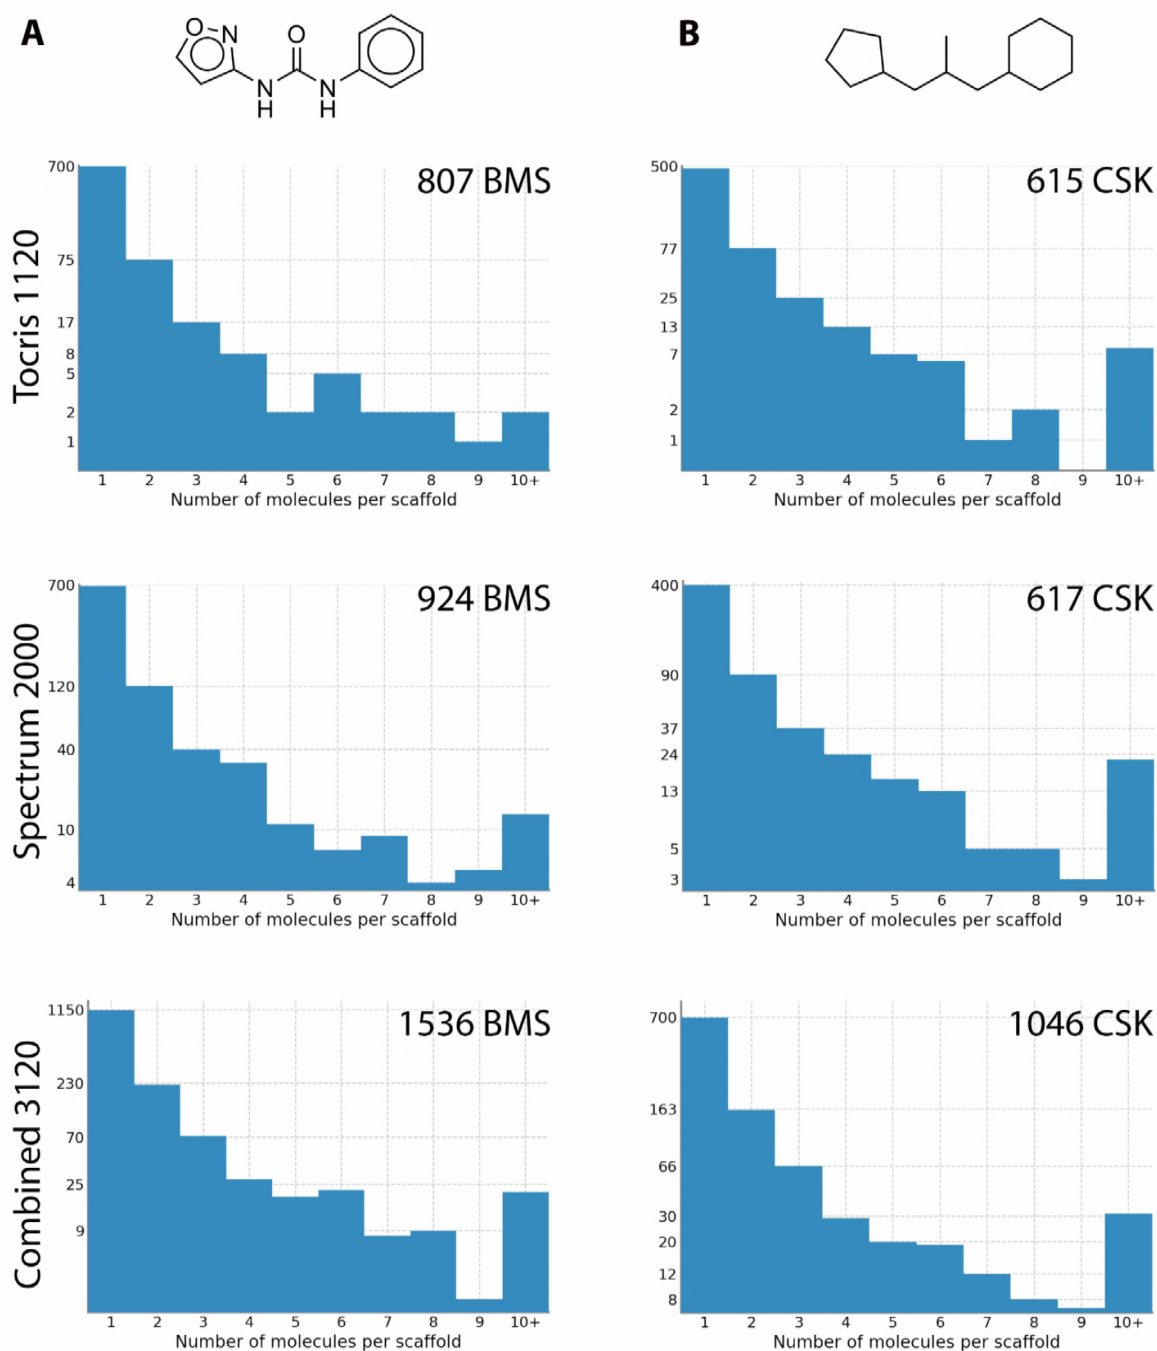

1030

1031 **Figure 3—Supplemental file 1. Scaffold analysis of compound structures in the Tocriscreen**  
1032 **Total and Spectrum libraries**

1033 Two different methods were used to remove side chains and determine the core structures of each  
1034 compound. Scaffolds were then compared and a histogram produced with the number of molecules  
1035 per scaffold. The histograms on the left use Bemis and Murcko scaffolds (Bemis and Murcko, 1996),  
1036 an example of which shown at the top. The histograms on the right were generated using CSK  
1037 scaffolds. The number of scaffolds for each library is shown in the top right of each graph. An  
1038 exemplary BMS scaffold and CSK scaffold (obtained from the same compound) are shown above the  
1039 histograms.

1040

1041 **Figure 3—Supplemental File 2. Dendrograms representing structural similarity between**  
1042 **library compounds**

1043 **A. Dendrogram—Tocris**

1044 Dendrogram of the Tocriscreen Total library compounds based on the similarity matrix between all  
1045 pairs of compounds (Ward's method of hierarchical agglomerative clustering—see Materials and  
1046 Methods). Compounds are named by their plate and well ID.

1047 **B. Dendrogram—Spectrum**

1048 Dendrogram of the Spectrum library compounds based on the similarity matrix between all pairs of  
1049 compounds. Compounds are named by their plate and well ID.

1050 **C. Dendrogram—Combined**

1051 Dendrogram of the combined Spectrum and Tocriscreen Total library compounds based on the  
1052 similarity matrix between all pairs of compounds. Compounds are named by their plate and well ID.

1053

1054

1055

1056

1057

1058

1059

1060 **Figure 4B interactive version.** Scatter plot of results from the primary screen (*adgrg6<sup>tb233c</sup> vcanb*  
1061 *rescue*) of Tocris and Spectrum libraries combined. Hover over individual dots for compound identity.  
1062 [https://adlvdl.github.io/visualizations/polar\\_scatterplot\\_whitfield\\_vcanb.html](https://adlvdl.github.io/visualizations/polar_scatterplot_whitfield_vcanb.html)

1063

1064

1065

1066

1067

1068

1069 **Figure 5B interactive version.** Network analysis based on structural similarity, showing all 3120  
1070 compounds from the Tocris and Spectrum libraries. Compounds that rescued *mbp* expression are  
1071 shown as larger nodes, while compounds that did not rescue *mbp* expression are shown as smaller  
1072 nodes. The colours used for compounds/nodes correspond to categories A–G (as indicated in Figure  
1073 3) and the two clusters of structurally similar compounds highlighted in Figure 4 are also shown here.  
1074 Zoom into individual nodes for Spectrum (S) and Tocris (T) plate number and well identity (cross-  
1075 reference to Supplementary Table S1).

1076 [https://adlvdl.github.io/visualizations/network\\_whitfield\\_vcanb\\_mbp/index.html](https://adlvdl.github.io/visualizations/network_whitfield_vcanb_mbp/index.html).

1077

1078  
1079

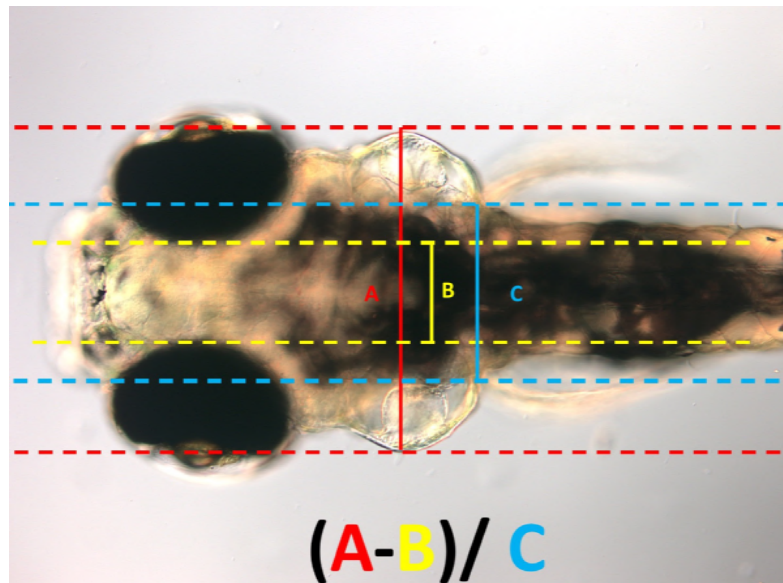

1080  
1081  
1082  
1083  
1084  
1085  
1086  
1087

**Figure 7—Supplemental file 1. Normalisation of ear width with respect to size of the head**

Live DIC image of an *adgrg6*<sup>tb233c</sup> mutant embryo at 110 hpf, mounted dorsally with anterior to the left, showing the parameters A, B and C (as defined in the figure) used to calculate the normalised ear width. This value was used to assess how the ear swelling is affected after treatment with different compounds.



1088

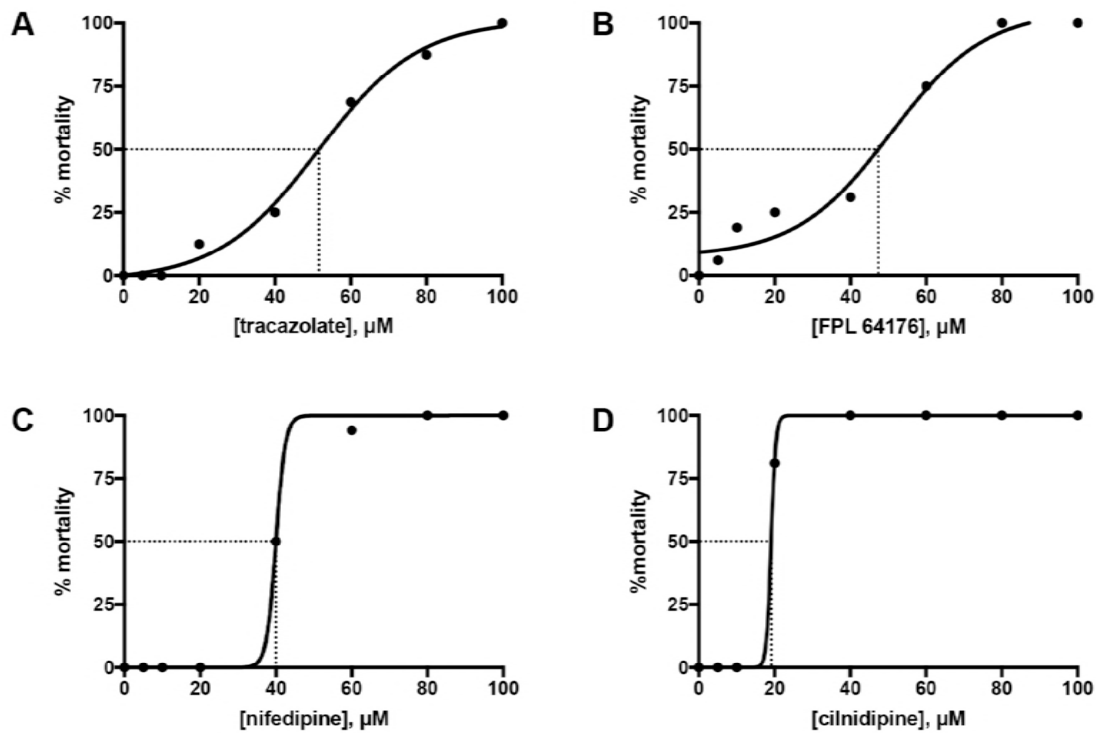

1089

1090

1091

1092

**Figure 7—Supplemental file 2. LD50 curves from the treatment of wild-type embryos from 60–110 hpf**

1093

1094

1095

1096

1097

1098

Sixteen LWT wild-type embryos, each kept in a separate well of a 96-well plate, were treated with each of the following concentrations: 5, 10, 20, 40, 60, 80 and 100 μM, from 60 to 110 hpf. At the end of the treatment, the number of alive versus dead embryos was counted and the mortality percentage was plotted against concentration. PRISM LD50, a nonlinear fit algorithm, was used to draw the curves for tracazolate hydrochloride (A), FPL 64176 (B), nifedipine (C) and cilnidipine (D). The LD50 was calculated as the concentration at which 50% of the embryos were dead.

**Supplementary Table S1.** List of the 89 hit compounds that rescued the expression of *vcanb* in *adgrg6<sup>tb233c</sup>* mutants and were followed up by *mbp* counter screens. The table includes the plate and well position of each compound, along with known activities and the raw data scores from nine *adgrg6<sup>tb233c</sup>* embryos in the *vcanb* assay (v1–v9), from six *adgrg6<sup>tb233c</sup>* embryos in the *mbp* assay (m1–m6) and from three *adgrg6<sup>fr24</sup>* embryos in the *fr24* (fr1–3) assay. Abbreviations: DE, dead embryo; ND, no data; S, Spectrum; T, Tocris.

| #  | Plate | Well | Compound name                             | Known activity                                                           | v1 | v2 | v3 | v4 | v5 | v6 | v7 | v8 | v9 | m1 | m2 | m3 | m4 | m5 | m6 | fr1 | fr2 | fr3 |
|----|-------|------|-------------------------------------------|--------------------------------------------------------------------------|----|----|----|----|----|----|----|----|----|----|----|----|----|----|----|-----|-----|-----|
| 1  | S18   | C09  | CARAPIN-8(9)-ENE                          | undetermined                                                             | 0  | 0  | 0  | 0  | 0  | 0  | 0  | 0  | 0  | 3  | 3  | 2  | 3  | 3  | 3  | 3   | 3   | 3   |
| 2  | S25   | D08  | 3-ISOBUTYL-1-METHYLXANTHINE (IBMX)        | phosphodiesterase inhibitor, non-selective adenosine receptor antagonist | 0  | 0  | 0  | 1  | 1  | 1  | 1  | 1  | 1  | 3  | 3  | 3  | 3  | 3  | 2  | 3   | 3   | 3   |
| 3  | S17   | F05  | DEOXYGEDUNIN                              | neuroprotective*                                                         | 0  | 0  | 0  | 2  | 0  | 0  | 2  | 1  | 1  | 3  | 3  | 3  | 3  | 3  | 1  | 3   | 3   | 3   |
| 4  | S23   | F10  | DIHYDROFISSINOLIDE                        | undetermined                                                             | 0  | 0  | 0  | 2  | 1  | 1  | 2  | 1  | 1  | 3  | 3  | 2  | 3  | 3  | 1  | 3   | 3   | 3   |
| 5  | S04   | B02  | IVERMECTIN                                | antiparasitic                                                            | 2  | 2  | 2  | 1  | 0  | 0  | 0  | 0  | 0  | 2  | 2  | 1  | 3  | 3  | 3  | 3   | 3   | 3   |
| 6  | T01   | F06  | SC-10                                     | protein kinase C activator, NMDA receptor activator                      | 2  | 2  | 2  | 2  | 2  | 1  | 2  | 2  | 2  | 3  | 3  | 3  | 2  | 1  | 1  | 3   | 3   | 3   |
| 7  | T01   | H11  | 1,3-DIPROPYL-8-PHENYLXANTHINE             | Selective adenosine A1 receptor antagonist                               | 2  | 2  | 1  | 0  | 0  | 0  | 2  | 2  | 1  | 3  | 3  | 2  | 2  | 2  | 1  | 3   | 3   | 3   |
| 8  | S17   | E02  | 3-DEOXO-3BETA-ACETOXYDEOXYDIHYDROGEDUNIN  | undetermined                                                             | 0  | 0  | 0  | 0  | 0  | 0  | 0  | 0  | 0  | 3  | 3  | 1  | 2  | 2  | 2  | 3   | 3   | 3   |
| 9  | T11   | F07  | CILNIDIPINE                               | dihydropyridine N- and L-type Ca <sup>2+</sup> channel blocker           | 0  | 0  | 0  | 1  | 1  | 1  | 1  | 1  | 1  | 3  | 2  | 2  | 2  | 2  | 2  | 3   | 3   | 3   |
| 10 | S13   | F03  | AMIODARONE HYDROCHLORIDE                  | coronary vasodilator, Ca <sup>2+</sup> channel blocker                   | 1  | 1  | 1  | 2  | 2  | 2  | 2  | 2  | 2  | 3  | 3  | 3  | 2  | 2  | 0  | 3   | 3   | 3   |
| 11 | S06   | E02  | HYDROCORTISONE HEMISUCCINATE              | glucocorticoid                                                           | 1  | 1  | 1  | 1  | 0  | 0  | 3  | 2  | 2  | 1  | 1  | 1  | 3  | 3  | 3  | 3   | 3   | 3   |
| 12 | T01   | C04  | (RS)-(TETRAZOL-5-YL) GLYCINE              | highly potent NMDA receptor agonist                                      | 2  | 1  | 1  | 0  | 0  | 0  | 2  | 2  | 1  | 2  | 2  | 2  | 2  | 1  | 1  | 3   | 3   | 3   |
| 13 | S02   | E05  | LOMEFLOXACIN HYDROCHLORIDE                | antibacterial                                                            | 1  | 1  | 1  | 3  | 2  | 1  | 3  | 2  | 2  | 1  | 1  | 1  | 3  | 2  | 2  | 3   | 3   | 3   |
| 14 | S13   | E04  | ETHAMIVAN                                 | CNS & respiratory stimulant                                              | 1  | 1  | 1  | 2  | 2  | 1  | 2  | 2  | 2  | 2  | 1  | 1  | 2  | 2  | 2  | 3   | 3   | 3   |
| 15 | T08   | B04  | CGS 15943                                 | potent adenosine receptor antagonist                                     | 2  | 2  | 2  | 2  | 2  | 2  | 2  | 1  | 1  | 1  | 1  | 1  | 2  | 2  | 2  | 3   | 3   | 3   |
| 16 | S13   | E09  | ASTEMIZOLE                                | H1 antihistamine (nonsedating)                                           | 1  | 1  | 1  | 2  | 1  | 1  | 3  | 2  | 2  | 1  | 1  | 1  | 2  | 2  | 2  | 3   | 3   | 3   |
| 17 | T02   | A09  | SKF 91488 DIHYDROCHLORIDE                 | histamine N-methyltransferase inhibitor                                  | 2  | 1  | 1  | 0  | 0  | 0  | 2  | 2  | 1  | 2  | 2  | 1  | 1  | 1  | 1  | 3   | 3   | 3   |
| 18 | S25   | F05  | 11ALPHA-HYDROXYPROGESTERONE HEMISUCCINATE | glucocorticoid                                                           | 1  | 1  | 1  | 0  | 0  | 0  | 2  | 2  | 1  | 1  | 1  | 1  | 2  | 2  | 1  | 3   | 3   | 3   |
| 19 | T14   | A07  | EFONIDIPINE HYDROCHLORIDE MONOETHANOLATE  | dihydropyridine L-type and T-type Ca <sup>2+</sup> channel blocker       | 1  | 1  | 1  | 1  | 0  | 0  | 3  | 2  | 2  | 2  | 2  | 1  | 1  | 1  | 1  | 3   | 3   | 3   |
| 20 | T05   | C09  | NIFEDIPINE                                | dihydropyridine L-type Ca <sup>2+</sup> channel blocker                  | 1  | 1  | 1  | 2  | 1  | 1  | 2  | 2  | 2  | 3  | 3  | 3  | 2  | 2  | 1  | 3   | 3   | 2   |

|    |     |     |                                   |                                                                                                           |   |   |   |   |   |   |    |    |    |    |    |    |    |    |    |    |    |    |
|----|-----|-----|-----------------------------------|-----------------------------------------------------------------------------------------------------------|---|---|---|---|---|---|----|----|----|----|----|----|----|----|----|----|----|----|
| 21 | T05 | E08 | CGP 37157                         | antagonist of mitochondrial Na <sup>+</sup> /Ca <sup>2+</sup> exchange                                    | 1 | 1 | 1 | 2 | 2 | 2 | 1  | 1  | 0  | 3  | 3  | 3  | 2  | 1  | 1  | 3  | 3  | 2  |
| 22 | S05 | D03 | DANAZOL                           | anterior pituitary suppressant, anti-estrogenic                                                           | 0 | 0 | 0 | 1 | 0 | 0 | 2  | 0  | 0  | 2  | 2  | 1  | 2  | 2  | 1  | 3  | 3  | 2  |
| 23 | S18 | H09 | XANTHYLETIN                       | undetermined                                                                                              | 0 | 0 | 0 | 0 | 0 | 0 | 1  | 1  | 1  | 2  | 2  | 1  | 2  | 1  | 1  | 3  | 3  | 2  |
| 24 | S18 | A06 | FERULIC ACID                      | antineoplastic, choleric, food preservative                                                               | 0 | 0 | 0 | 1 | 1 | 1 | 3  | 3  | 2  | 1  | 1  | 1  | 2  | 2  | 1  | 3  | 3  | 2  |
| 25 | S18 | F02 | ALPHA-DIHYDROGEDUNOL              | undetermined                                                                                              | 0 | 0 | 0 | 2 | 1 | 1 | 1  | 1  | 1  | 2  | 1  | 1  | 2  | 1  | 1  | 3  | 3  | 2  |
| 26 | T05 | F04 | (S)-(+)-NIGULDIPINE HYDROCHLORIDE | dihydropyridine L-type Ca <sup>2+</sup> channel blocker, $\alpha$ 1 antagonist                            | 2 | 2 | 2 | 2 | 1 | 1 | 1  | 0  | 0  | DE | DE | DE | 2  | 2  | 1  | 3  | 2  | 2  |
| 27 | T07 | F02 | TRACAZOLATE HYDROCHLORIDE         | subtype-selective GABA <sub>A</sub> allosteric modulator                                                  | 1 | 1 | 1 | 1 | 0 | 0 | 1  | 1  | 1  | 2  | 2  | 2  | 1  | 1  | 1  | 3  | 2  | 2  |
| 28 | S10 | E02 | NIMODIPINE                        | dihydropyridine L-type Ca <sup>2+</sup> channel blocker                                                   | 0 | 0 | 0 | 0 | 0 | 0 | 1  | 0  | 0  | 2  | 2  | 1  | 3  | 3  | 3  | 2  | 2  | 2  |
| 29 | S17 | E06 | 3BETA-ACETOXYDEOXODIHYDROGEDUNIN  | undetermined                                                                                              | 0 | 0 | 0 | 2 | 2 | 2 | 0  | 0  | 0  | 2  | 1  | 1  | 2  | 2  | 1  | 2  | 2  | 1  |
| 30 | S17 | F02 | DIHYDROGEDUNIN                    | undetermined                                                                                              | 0 | 0 | 0 | 2 | 2 | 1 | 0  | 0  | 0  | 2  | 2  | 2  | 2  | 2  | 0  | 2  | 0  | 0  |
| 31 | S22 | F09 | TANGERITIN                        | undetermined                                                                                              | 0 | 0 | 0 | 0 | 0 | 0 | 2  | 1  | 1  | 2  | 2  | 1  | 2  | 2  | 2  | 1  | 0  | 0  |
| 32 | S10 | F07 | COLFORSIN                         | adenylate cyclase activator, antiglaucoma, hypotensive, vasodilator                                       | 0 | 0 | 0 | 0 | 0 | 0 | 0  | 0  | 0  | 3  | 3  | 3  | 3  | 3  | 3  | 0  | 0  | 0  |
| 33 | T04 | G02 | IMILOXAN HYDROCHLORIDE            | selective $\alpha_{2B}$ -adrenoceptor antagonist                                                          | 0 | 0 | 0 | 1 | 1 | 0 | ND | ND | ND | 3  | 3  | 3  | ND | ND | ND | ND | ND | ND |
| 34 | S24 | C03 | 3ALPHA-ACETOXYDIHYDRODEOXYGEDUNIN | undetermined                                                                                              | 0 | 0 | 0 | 1 | 0 | 0 | 0  | 0  | 0  | 3  | 3  | 3  | 3  | 3  | 2  | DE | DE | DE |
| 35 | S11 | E02 | EZETIMIBE                         | antihyperlipidemic (sterol absorption inhibitor)                                                          | 0 | 0 | 0 | 2 | 2 | 2 | 0  | 0  | 0  | 3  | 3  | 3  | 2  | 2  | 2  | 0  | 0  | 0  |
| 36 | S10 | E06 | NITRENDIPINE                      | dihydropyridine L-type Ca <sup>2+</sup> channel blocker                                                   | 1 | 1 | 1 | 0 | 0 | 0 | 1  | 0  | 0  | 3  | 2  | 2  | ND | ND | ND | ND | ND | ND |
| 37 | S11 | E08 | ROSUVASTATIN CALCIUM              | antihyperlipidemic                                                                                        | 0 | 0 | 0 | 0 | 0 | 0 | 0  | 0  | 0  | 2  | 1  | 1  | 3  | 3  | 2  | 0  | 0  | 0  |
| 38 | S22 | C07 | DEMETHYLNOBILETIN                 | undetermined                                                                                              | 0 | 0 | 0 | 0 | 0 | 0 | 0  | 0  | 0  | 2  | 2  | 2  | 2  | 2  | 2  | 0  | 0  | 0  |
| 39 | S22 | G11 | HEXAMETHYLQUERCETAGETIN           | undetermined                                                                                              | 0 | 0 | 0 | 0 | 0 | 0 | 0  | 0  | 0  | 2  | 2  | 1  | 2  | 2  | 2  | DE | DE | DE |
| 40 | S22 | F08 | NOBILETIN                         | matrix metalloproteinase inhibitor, antineoplastic, anti-ERK <sup>*</sup> , NF-kB suppressor <sup>*</sup> | 0 | 0 | 0 | 0 | 0 | 0 | 0  | 0  | 0  | 2  | 2  | 1  | 2  | 2  | 1  | DE | DE | DE |
| 41 | S12 | H07 | PREGNENOLONE SUCCINATE            | glucocorticoid, antiinflammatory                                                                          | 1 | 1 | 1 | 2 | 2 | 1 | 2  | 2  | 2  | 1  | 1  | 1  | 3  | 1  | 1  | DE | DE | DE |
| 42 | S05 | E06 | DICLOFENAC SODIUM                 | non steroidal, antiinflammatory                                                                           | 2 | 2 | 2 | 0 | 0 | 0 | 3  | 2  | 1  | 1  | 1  | 1  | 1  | 1  | 1  | 0  | 0  | 0  |
| 43 | T09 | C07 | GTP 14564                         | class III receptor tyrosine kinase (RTK) inhibitor                                                        | 1 | 1 | 0 | 0 | 0 | 0 | 0  | 0  | 0  | 2  | 1  | 1  | 1  | 1  | 0  | 0  | 0  | 0  |
| 44 | T07 | H02 | D-64131                           | tubulin polymerisation inhibitor, antitumor in vivo                                                       | 1 | 0 | 0 | 1 | 1 | 1 | 3  | 2  | 2  | 1  | 1  | 0  | 1  | 1  | 1  | 0  | 0  | 0  |

|    |     |     |                                                 |                                                                                               |   |   |   |   |   |   |   |   |   |    |    |    |   |   |   |   |   |    |
|----|-----|-----|-------------------------------------------------|-----------------------------------------------------------------------------------------------|---|---|---|---|---|---|---|---|---|----|----|----|---|---|---|---|---|----|
| 45 | S10 | G05 | IOPANIC ACID                                    | radioopaque agent                                                                             | 0 | 0 | 0 | 2 | 2 | 2 | 3 | 2 | 2 | 1  | 1  | 0  | 1 | 1 | 1 | 0 | 0 | DE |
| 46 | S18 | H11 | ANGOLENSIN (R)                                  | antimalarial*                                                                                 | 0 | 0 | 0 | 0 | 0 | 0 | 3 | 2 | 2 | 1  | 1  | 1  | 1 | 0 | 0 | 0 | 0 | 0  |
| 47 | S22 | G09 | SINENSETIN                                      | increases cAMP levels in adipocytes*                                                          | 2 | 2 | 2 | 1 | 1 | 1 | 2 | 1 | 1 | 2  | 0  | 0  | 2 | 1 | 1 | 1 | 1 | 0  |
| 48 | T09 | F06 | CMPD-1                                          | selective inhibitor of p38 $\alpha$ -mediated MK2a phosphorylation                            | 0 | 0 | 0 | 0 | 0 | 0 | 1 | 0 | 0 | 1  | 1  | 1  | 1 | 1 | 0 | 1 | 1 | 0  |
| 49 | T06 | A07 | BHQ                                             | inhibitor of endoplasmic reticulum Ca <sup>2+</sup> -ATPase.                                  | 1 | 0 | 0 | 1 | 1 | 1 | 0 | 0 | 0 | 2  | 1  | 1  | 1 | 1 | 1 | 2 | 2 | 0  |
| 50 | S18 | G06 | 2,3-DIHYDROXY-4-METHOXY-4'-ETHOXYBENZOPHENONE   | undetermined                                                                                  | 0 | 0 | 0 | 1 | 0 | 0 | 1 | 1 | 0 | 2  | 1  | 1  | 1 | 1 | 1 | 3 | 2 | 0  |
| 51 | T06 | G04 | PP 1                                            | selective Src family tyrosine kinase inhibitor                                                | 1 | 0 | 0 | 2 | 2 | 1 | 2 | 2 | 2 | 1  | 1  | 1  | 1 | 1 | 1 | 2 | 2 | 2  |
| 52 | T12 | A08 | CPT 11                                          | DNA topoisomerase I inhibitor, antitumor                                                      | 2 | 1 | 1 | 2 | 2 | 2 | 2 | 1 | 1 | 1  | 1  | 1  | 1 | 1 | 1 | 2 | 2 | 2  |
| 53 | S16 | G11 | MEPIROXOL                                       | anthyperlipemic                                                                               | 0 | 0 | 0 | 0 | 0 | 0 | 2 | 1 | 0 | 1  | 1  | 1  | 2 | 1 | 1 | 3 | 2 | 2  |
| 54 | T06 | G10 | FPL 64176                                       | potent activator of L-type Ca <sup>2+</sup> channels, N-type Ca <sup>2+</sup> channel blocker | 1 | 0 | 0 | 1 | 1 | 1 | 0 | 0 | 0 | 1  | 1  | 1  | 1 | 1 | 1 | 3 | 2 | 2  |
| 55 | T08 | D11 | 2-METHOXYESTRADIOL                              | apoptotic, antiangiogenic                                                                     | 1 | 1 | 1 | 2 | 1 | 1 | 2 | 2 | 1 | 1  | 1  | 1  | 1 | 1 | 0 | 3 | 2 | 2  |
| 56 | S15 | E10 | CARBIMAZOLE                                     | antithyroid                                                                                   | 1 | 1 | 1 | 2 | 2 | 1 | 3 | 3 | 2 | 1  | 1  | 1  | 1 | 1 | 1 | 3 | 3 | 2  |
| 57 | T07 | D03 | CGP 7930                                        | positive modulator at GABA <sub>B</sub> receptors                                             | 1 | 1 | 1 | 2 | 1 | 1 | 3 | 3 | 2 | 1  | 1  | 1  | 1 | 1 | 1 | 3 | 3 | 2  |
| 58 | T02 | D07 | METHIOTHEPIN MALEATE                            | potent 5-HT <sub>2</sub> and 5-HT <sub>1</sub> antagonist                                     | 0 | 0 | 0 | 0 | 0 | 0 | 1 | 1 | 1 | DE | DE | DE | 1 | 1 | 1 | 3 | 3 | 2  |
| 59 | T02 | A11 | GBR 12935 DIHYDROCHLORIDE                       | selective inhibitor of dopamine uptake                                                        | 2 | 2 | 1 | 0 | 0 | 0 | 3 | 3 | 1 | 1  | 1  | 1  | 2 | 1 | 1 | 3 | 3 | 3  |
| 60 | S25 | A06 | CHOLIC ACID                                     | undetermined                                                                                  | 1 | 1 | 1 | 0 | 0 | 0 | 3 | 2 | 2 | 1  | 1  | 1  | 2 | 1 | 1 | 3 | 3 | 3  |
| 61 | S16 | F04 | MANNITOL                                        | diuretic, sweetener, diagnostic aid                                                           | 1 | 1 | 1 | 2 | 2 | 2 | 2 | 2 | 2 | 1  | 1  | 1  | 2 | 1 | 1 | 3 | 3 | 3  |
| 62 | S11 | H04 | DECOQUINATE                                     | coccidiostat                                                                                  | 1 | 1 | 1 | 0 | 0 | 0 | 2 | 2 | 2 | 1  | 1  | 1  | 1 | 1 | 1 | 3 | 3 | 3  |
| 63 | S17 | C06 | 3-DEOXO-3BETA-HYDROXYMEXICANOLIDE 16-ENOL ETHER | undetermined                                                                                  | 0 | 0 | 0 | 0 | 0 | 0 | 2 | 2 | 2 | 1  | 1  | 1  | 1 | 1 | 1 | 3 | 3 | 3  |
| 64 | T05 | H11 | DL-TBOA                                         | non-transportable blocker of excitatory amino acid transporters                               | 2 | 2 | 2 | 2 | 2 | 2 | 2 | 2 | 2 | DE | DE | DE | 1 | 1 | 1 | 3 | 3 | 3  |
| 65 | T12 | D09 | SD 208                                          | potent ATP-competitive TGF- $\beta$ R1 inhibitor                                              | 1 | 1 | 1 | 1 | 1 | 1 | 2 | 1 | 1 | 1  | 1  | 1  | 1 | 1 | 1 | 3 | 3 | 3  |
| 66 | S18 | C08 | HARMINE                                         | antiparkinsonian, CNS stimulant                                                               | 1 | 1 | 1 | 2 | 2 | 2 | 2 | 1 | 1 | 1  | 1  | 1  | 1 | 1 | 1 | 3 | 3 | 3  |
| 67 | S18 | D03 | 7-DESHYDROXYPYROGALLIN-4-CARBOXYLIC ACID        | undetermined                                                                                  | 1 | 1 | 1 | 0 | 0 | 0 | 2 | 1 | 1 | 1  | 1  | 1  | 1 | 1 | 1 | 3 | 3 | 3  |
| 68 | T07 | C09 | TMS                                             | cytochrome P450 1B1 inhibitor                                                                 | 0 | 0 | 0 | 0 | 0 | 0 | 2 | 2 | 2 | 1  | 1  | 0  | 1 | 1 | 1 | 3 | 3 | 3  |

|    |     |     |                                             |                                                                |   |   |   |   |   |   |    |    |    |   |   |   |    |    |    |    |    |    |    |
|----|-----|-----|---------------------------------------------|----------------------------------------------------------------|---|---|---|---|---|---|----|----|----|---|---|---|----|----|----|----|----|----|----|
| 69 | S19 | F06 | LARIXOL ACETATE                             | potent TRPC6 inhibitor*                                        | 0 | 0 | 0 | 1 | 1 | 2 | 3  | 3  | 3  | 0 | 0 | 0 | 0  | 0  | 1  | 3  | 3  | 3  |    |
| 70 | S02 | C03 | ECONAZOLE NITRATE                           | antifungal                                                     | 0 | 0 | 0 | 0 | 0 | 0 | 2  | 2  | 2  | 0 | 0 | 0 | 0  | 0  | 0  | 0  | 0  | 1  |    |
| 71 | S01 | H03 | MEBENDAZOLE                                 | anthelmintic                                                   | 1 | 1 | 1 | 0 | 0 | 0 | 1  | 1  | 1  | 0 | 0 | 1 | 0  | 0  | 0  | 0  | 0  | 0  |    |
| 72 | S21 | C06 | GITOXIN                                     | cardiotonic                                                    | 1 | 1 | 1 | 0 | 0 | 1 | 0  | 0  | 0  | 0 | 0 | 0 | 0  | 1  | 1  | 0  | 0  | DE |    |
| 73 | S19 | C09 | DEOXSAPPANONE B 7,3'-DIMETHYL ETHER ACETATE | undetermined                                                   | 0 | 0 | 0 | 0 | 0 | 0 | 0  | 0  | 0  | 0 | 1 | 1 | 0  | 0  | 0  | 2  | 1  | 0  |    |
| 74 | S05 | F04 | DIGITOXIN                                   | inotropic, cardiotonic                                         | 0 | 0 | 0 | 1 | 2 | 1 | 0  | 0  | 0  | 0 | 0 | 0 | 0  | 0  | 0  | 0  | 0  | 0  |    |
| 75 | S05 | G06 | DISULFIRAM                                  | alcohol antagonist                                             | 0 | 0 | 0 | 0 | 0 | 0 | 1  | 1  | 1  | 0 | 0 | 0 | 0  | 0  | 0  | 0  | 0  | 1  |    |
| 76 | S02 | A10 | SULCONAZOLE NITRATE                         | antifungal                                                     | 0 | 0 | 0 | 0 | 0 | 0 | 1  | 1  | 2  | 0 | 0 | 0 | 0  | 0  | 0  | 0  | DE | DE | DE |
| 77 | S18 | B08 | BAICALEIN                                   | antiviral (HIV)                                                | 0 | 0 | 0 | 0 | 0 | 0 | 0  | 0  | 0  | 1 | 1 | 1 | 0  | 0  | 0  | 0  | 0  | DE |    |
| 78 | S05 | B07 | CLOTRIMAZOLE                                | antifungal                                                     | 0 | 0 | 0 | 0 | 0 | 0 | 0  | 0  | 0  | 1 | 1 | 1 | 0  | 0  | 0  | 0  | 0  | 0  |    |
| 79 | S03 | B10 | LOVASTATIN                                  | antihyperlipidemic, HMGCoA reductase inhibitor                 | 0 | 0 | 0 | 0 | 0 | 0 | 0  | 0  | 0  | 0 | 0 | 0 | 1  | 1  | 1  | DE | DE | DE |    |
| 80 | S13 | C11 | CYPROHEPTADINE HYDROCHLORIDE                | H1-antihistamine, antipruritic                                 | 0 | 0 | 0 | 0 | 0 | 0 | 0  | 0  | 0  | 0 | 0 | 0 | 0  | 1  | 1  | 0  | 0  | 0  |    |
| 81 | S24 | E10 | 5-FLUOROINDOLE-2-CARBOXYLIC ACID            | NMDA receptor antagonist (gly)                                 | 0 | 0 | 0 | 0 | 0 | 0 | 0  | 0  | 0  | 0 | 0 | 0 | 1  | 0  | 0  | 0  | 0  | 0  |    |
| 82 | S10 | F11 | ALBENDAZOLE                                 | anthelmintic                                                   | 0 | 0 | 0 | 0 | 0 | 0 | 0  | 0  | 0  | 0 | 0 | 0 | 0  | 0  | 0  | 1  | 0  | 0  | 0  |
| 83 | S19 | A05 | DEOXSAPPANONE B 7,4'-DIMETHYL ETHER         | undetermined                                                   | 0 | 0 | 0 | 0 | 0 | 0 | 0  | 0  | 0  | 1 | 0 | 0 | 0  | 0  | 0  | 0  | 0  | 0  |    |
| 84 | S25 | A03 | ARTENIMOL                                   | antimalarial, antiinflammatory                                 | 0 | 0 | 0 | 0 | 0 | 0 | 0  | 0  | 0  | 0 | 0 | 0 | 0  | 0  | 0  | 0  | 0  | 0  |    |
| 85 | S16 | H09 | CHAULMOOGRIC ACID                           | antibacterial (mycobacteria)                                   | 0 | 0 | 0 | 0 | 0 | 0 | 0  | 0  | 0  | 0 | 0 | 0 | 0  | 0  | 0  | 0  | 0  | 0  |    |
| 86 | S01 | G06 | FENBENDAZOLE                                | anthelmintic                                                   | 0 | 0 | 0 | 0 | 0 | 0 | 0  | 0  | 0  | 0 | 0 | 0 | 0  | 0  | 0  | 0  | 0  | 0  |    |
| 87 | S18 | E08 | GEDUNIN                                     | antifeedant, heat shock inducer, Hsp90 inhibitor*, anticancer* | 0 | 0 | 0 | 0 | 0 | 0 | 0  | 0  | 0  | 0 | 0 | 0 | 0  | 0  | 0  | 0  | DE | DE | DE |
| 88 | S03 | G11 | PODOFILOX                                   | antineoplastic, antimitotic                                    | 0 | 0 | 0 | 0 | 0 | 0 | 0  | 0  | 0  | 0 | 0 | 0 | 0  | 0  | 0  | 0  | 0  | 0  |    |
| 89 | T07 | H03 | LONIDAMINE                                  | anticancer, mitochondrial hexokinase inhibitor                 | 0 | 0 | 0 | 0 | 0 | 0 | ND | ND | ND | 0 | 0 | 0 | ND | ND | ND | ND | ND | ND |    |

\*Deoxygedunin: (Jang et al., 2010); Nobiletin: (Cheng et al., 2016); Angolensin (R): (Weisman et al., 2006); Sinensetin: (Kang et al., 2015); Larixol acetate: (Urban et al., 2016); Gedunin: (Hieronymus et al., 2006; Subramani et al., 2017).

## References

- Ackerman, S. D., Garcia, C., Piao, X., Gutmann, D. H. and Monk, K. R.** (2015). The adhesion GPCR Gpr56 regulates oligodendrocyte development via interactions with Galpha12/13 and RhoA. *Nat Commun* **6**, 6122.
- Ackerman, S. D., Luo, R., Poitelon, Y., Mogha, A., Harty, B. L., D'Rozario, M., Sanchez, N. E., Lakkaraju, A. K. K., Gamble, P., Li, J., et al.** (2018). GPR56/ADGRG1 regulates development and maintenance of peripheral myelin. *J Exp Med* **215**, 941-961.
- Altmann, S., Davis, H. J., Zhu, L., Yao, X., Hoos, L., Tetzloff, G., Iyer, S., Maguire, M., Golovko, A., Zeng, M., et al.** (2004). Niemann-Pick C1 Like 1 protein is critical for intestinal cholesterol absorption. *Science* **303**, 1201-1204.
- Andersson-Sjöland, A., Hallgren, O., Rolandsson, S., Weitoft, M., Tykesson, E., Larsson-Callerfelt, A. K., Rydell-Törmänen, K., Bjerner, L., Malmström, A., Karlsson, J. C., et al.** (2015). Versican in inflammation and tissue remodeling: the impact on lung disorders. *Glycobiology* **25**, 243-251.
- Baxendale, S., Holdsworth, C., Meza Santoscoy, P., Harrison, M., Fox, J., Parkin, C., Ingham, P. and Cunliffe, V.** (2012). Identification of compounds with anti-convulsant properties in a zebrafish model of epileptic seizures. *Dis. Mod. Mech.* **5**, 773-784.
- Baxendale, S., van Eeden, F. and Wilkinson, R.** (2017). The Power of Zebrafish in Personalised Medicine. *Adv. Exp. Med. Biol.* **1007**, 179-197.
- Baxendale, S. and Whitfield, T.** (2016). Methods to study the development, anatomy, and function of the zebrafish inner ear across the life course. *Meth. Cell. Biol.* **134**, 165-209.
- Bemis, G. and Murcko, M.** (1996). The properties of known drugs. 1. Molecular frameworks. *J. Med. Chem.* **39**, 2887-2893.
- Berthold, M., Cebron, N., Dill, F., Gabriel, T., Kotter, T., Meini, T., Ohl, P., Thiel, K. and Wiswedel, B.** (2009). KNIME – The Konstanz Information Miner. *SIGKDD Explorations* **11**, 26-31.
- Brady, C., Rennekamp, A. and Peterson, R.** (2016). Chemical Screening in Zebrafish. *Methods Mol. Biol.* **1451**, 3-16.
- Braid, N., Behzad, S., Habtemariam, S., Ahmed, T., Daglia, M., Nabavi, S. M., Sobarzo-Sanchez, E. and Nabavi, S. F.** (2017). Neuroprotective Effects of Citrus Fruit-Derived Flavonoids, Nobiletin and Tangeretin in Alzheimer's and Parkinson's Disease. *CNS Neurol Disord Drug Targets* **16**, 387-397.
- Brösamle, C. and Halpern, M. E.** (2002). Characterization of myelination in the developing zebrafish. *Glia* **39**, 47-57.
- Bruni, G., Rennekamp, A., Velenich, A., McCarroll, M., Gendele, L., Fertsch, E., Taylor, J., Lakhani, P., Lensen, D., Evron, T., et al.** (2016). Zebrafish behavioral profiling identifies multitarget antipsychotic-like compounds. *Nat. Chem. Biol.* **12**.
- Buck, L. M. J., Winter, M. J., Redfern, W. S. and Whitfield, T. T.** (2012). Ototoxin-induced cellular damage in neuromasts disrupts lateral line function in larval zebrafish. *Hear. Res.* **284**, 67-81.
- Buckley, C., Marguerie, A., Roach, A., Goldsmith, P., Fleming, A., Alderton, W. and Franklin, R.** (2010). Drug reprofiling using zebrafish identifies novel compounds with potential pro-myelination effects. *Neuropharmacology* **59**, 149-159.
- Cheng, H. L., Hsieh, M. J., Yang, J. S., Lin, C. W., Lue, K. H., Lu, K. H. and Yang, S. F.** (2016). Nobiletin inhibits human osteosarcoma cells metastasis by blocking ERK and JNK-mediated MMPs expression. *Oncotarget* **7**, 35208-35223.
- Chowdhury, R., Candela-Lena, J., Chan, M., Greenald, D., Yeoh, K., Tian, Y., McDonough, M., Tumber, A., Rose, N., Conejo-Garcia, A., et al.** (2013). Selective small molecule probes for the hypoxia inducible factor (HIF) prolyl hydroxylases. *ACS Chem. Biol.* **8**, 1488-1496.
- Demberg, L., Winkler, J., Wilde, C., Simon, K., Schön, J., Rothmund, S., Schöneberg, T., Prömel, S. and Liebscher, I.** (2017). Activation of Adhesion G Protein-coupled Receptors: AGONIST SPECIFICITY OF STACHEL SEQUENCE-DERIVED PEPTIDES. *J. Biol. Chem.* **292**, 4383-4394.

- Early, J., Cole, K., Williamson, J., Swire, M., Kamadurai, H., Muskavitch, M. and Lyons, D.** (2018). An automated high-resolution in vivo screen in zebrafish to identify chemical regulators of myelination. *Elife* **7**, e35136.
- English, A. W., Liu, K., Nicolini, J. M., Mulligan, A. M. and Ye, K.** (2013). Small-molecule trkB agonists promote axon regeneration in cut peripheral nerves. *Proc Natl Acad Sci U S A* **110**, 16217-16222.
- Geng, F., Abbas, L., Baxendale, S., Holdsworth, C., Swanson, A. G., Slanchev, K., Hammerschmidt, M., Topczewski, J. and Whitfield, T.** (2013). Semicircular canal morphogenesis in the zebrafish inner ear requires the function of *gpr126* (*lauscher*), an adhesion G protein-coupled receptor gene. *Development* **140**, 4362-4374.
- Giera, S., Deng, Y., Luo, R., Ackerman, S. D., Mogha, A., Monk, K. R., Ying, Y., Jeong, S. J., Makinodan, M., Bialas, A. R., et al.** (2015). The adhesion G protein-coupled receptor GPR56 is a cell-autonomous regulator of oligodendrocyte development. *Nat Commun* **6**, 6121.
- Glenn, T. D. and Talbot, W. S.** (2013). Analysis of Gpr126 function defines distinct mechanisms controlling the initiation and maturation of myelin. *Development* **140**, 3167-3175.
- Griffin, A., Hamling, K., Knupp, K., Hong, S., Lee, L. and Baraban, S.** (2017). Clemizole and modulators of serotonin signalling suppress seizures in Dravet syndrome. *Brain* **140**, 669-683.
- Hamann, J., Aust, G., Arac, D., Engel, F. B., Formstone, C., Fredriksson, R., Hall, R. A., Harty, B. L., Kirchhoff, C., Knapp, B., et al.** (2015). International Union of Basic and Clinical Pharmacology. XCIV. Adhesion G protein-coupled receptors. *Pharmacol Rev* **67**, 338-367.
- Hauser, A., Attwood, M., Rask-Andersen, M., Schiöth, H. and Gloriam, D.** (2017). Trends in GPCR drug discovery: new agents, targets and indications. *Nat. Rev. Drug Discov.* **16**, 829-842.
- Heller, S., McNaught, A., Pletnev, I., Stein, S. and Tchekhovskoi, D.** (2015). InChI, the IUPAC International Chemical Identifier. *J. Cheminformatics* **7**, 23.
- Hieronimus, H., Lamb, J., Ross, K., Peng, X., Clement, C., Rodina, A., Nieto, M., Du, J., Stegmaier, K., Raj, S., et al.** (2006). Gene expression signature-based chemical genomic prediction identifies a novel class of HSP90 pathway modulators. *Cancer Cell* **10**, 321-330.
- Hruscha, A., Krawitz, P., Rechenberg, A., Heinrich, V., Hecht, J., Haass, C. and Schmid, B.** (2013). Efficient CRISPR/Cas9 genome editing with low off-target effects in zebrafish. *Development* **140**, 4982-4987.
- Huang, P., Zheng, S., Wierbowski, B., Kim, Y., Nedelcu, D., Aravena, L., Liu, J., Kruse, A. and Salic, A.** (2018). Structural Basis of Smoothed Activation in Hedgehog Signaling. *Cell* **174**, 312-324.
- Hunter, J.** (2007). Matplotlib: A 2D Graphics Environment. *Comp. Sci. Engi.* **9**, 90-95.
- Hwang, W., Fu, Y., Reyon, D., Maeder, M., Tsai, S., Sander, J., Peterson, R., Yeh, J. and Joung, J.** (2013). Efficient genome editing in zebrafish using a CRISPR-Cas system. *Nat. Biotech.* **31**, 227-229.
- Istvan, E. and Deisenhofer, J.** (2001). Structural mechanism for statin inhibition of HMG-CoA reductase. *Science* **292**, 1160-1164.
- Jang, S., Liu, X., Chan, C., France, S., Sayeed, I., Tang, W., Lin, X., Xiao, G., Andero, R., Chang, Q., et al.** (2010). Deoxygedunin, a natural product with potent neurotrophic activity in mice. *PLoS One* **5**, e11528.
- Kalueff, A. V., Echevarria, D. J., Homechaudhuri, S., Stewart, A. M., Collier, A. D., Kaluyeva, A. A., Li, S., Liu, Y., Chen, P., Wang, J., et al.** (2016). Zebrafish neurobehavioral phenomics for aquatic neuropharmacology and toxicology research. *Aquat Toxicol* **170**, 297-309.
- Kang, J. S., Oohashi, T., Kawakami, Y., Bekku, Y., Izpisua Belmonte, J. C. and Ninomiya, Y.** (2004). Characterization of *dermacan*, a novel zebrafish lectican gene, expressed in dermal bones. *Mech. Dev.* **121**, 301-312.
- Kang, S., Shin, H. and Kim, S.** (2015). Sinensetin enhances adipogenesis and lipolysis by increasing cyclic adenosine monophosphate levels in 3T3-L1 adipocytes. *Biol. Pharm. Bull.* **38**, 552-558.

- Karner, C., Long, F., Solnica-Krezel, L., Monk, K. and Gray, R.** (2015). Gpr126/Adgrg6 deletion in cartilage models idiopathic scoliosis and pectus excavatum in mice. *Hum. Mol. Genet.* **24**, 4365-4373.
- Keough, M. B., Rogers, J. A., Zhang, P., Jensen, S. K., Stephenson, E. L., Chen, T., Hurlbert, M. G., Lau, L. W., Rawji, K. S., Plemel, J. R., et al.** (2016). An inhibitor of chondroitin sulfate proteoglycan synthesis promotes central nervous system remyelination. *Nat Commun* **7**, 11312.
- Komor, A., Kim, Y., Packer, M., Zuris, J. and Liu, D.** (2016). Programmable editing of a target base in genomic DNA without double-stranded DNA cleavage. *Nature* **533**, 420-424.
- Langenhan, T., Piao, X. and Monk, K.** (2016). Adhesion G protein-coupled receptors in nervous system development and disease. *Nat. Rev. Neurosci.* **17**, 550-561.
- Liebscher, I., Schön, J., Petersen, S., Fischer, L., Auerbach, N., Demberg, L., Mogha, A., Cöster, M., Simon, K., Rothmund, S., et al.** (2014). A tethered agonist within the ectodomain activates the adhesion G protein-coupled receptors GPR126 and GPR133. *Cell Rep.* **9**, 2018-2026.
- Lister, J. A., Robertson, C. P., Lepage, T., Johnson, S. L. and Raible, D. W.** (1999). *nacre* encodes a zebrafish microphthalmia-related protein that regulates neural-crest-derived pigment cell fate. *Development* **126**, 3757-3767.
- Liu, L., Gonzalez, P. K., Barrett, C. F. and Rittenhouse, A. R.** (2003). The calcium channel ligand FPL 64176 enhances L-type but inhibits N-type neuronal calcium currents. *Neuropharmacology* **45**, 281-292.
- Luchetti, G., Sircar, R., Kong, J., Nachtergaele, S., Sagner, A., Byrne, E., Covey, D., Siebold, C. and Rohatg, i. R.** (2018). Cholesterol activates the G-protein coupled receptor Smoothed to promote Hedgehog signaling. *Elife* **5**, e20304.
- Ma, W., Feng, S., Yao, X., Yuan, Z., Liu, L. and Xie, Y.** (2015). Nobiletin enhances the efficacy of chemotherapeutic agents in ABCB1 overexpression cancer cells. *Sci Rep* **5**, 18789.
- Millar, M. W., Corson, N. and Xu, L.** (2018). The Adhesion G-Protein-Coupled Receptor, GPR56/ADGRG1, Inhibits Cell-Extracellular Matrix Signaling to Prevent Metastatic Melanoma Growth. *Front Oncol* **8**, 8.
- Mogha, A., Benesh, A., Patra, C., Engel, F., Schöneberg, T., Liebscher, I. and Monk, K.** (2013). Gpr126 functions in Schwann cells to control differentiation and myelination via G-protein activation. *J. Neurosci.* **33**, 17976-17985.
- Monk, K. R., Hamann, J., Langenhan, T., Nijmeijer, S., Schoneberg, T. and Liebscher, I.** (2015). Adhesion G Protein-Coupled Receptors: From In Vitro Pharmacology to In Vivo Mechanisms. *Mol Pharmacol* **88**, 617-623.
- Monk, K. R., Naylor, S. G., Glenn, T. D., Mercurio, S., Perlin, J. R., Dominguez, C., Moens, C. B. and Talbot, W. S.** (2009). A G protein-coupled receptor is essential for Schwann cells to initiate myelination. *Science* **325**, 1402-1405.
- Monk, K. R., Oshima, K., Jörs, S., Heller, S. and Talbot, W. S.** (2011). Gpr126 is essential for peripheral nerve development and myelination in mammals. *Development* **138**, 2673-2680.
- Nie, S., Xu, Y., Chen, G., Ma, K., Han, C., Guo, Z., Zhang, Z., Ye, K. and Cao, X.** (2015). Small molecule TrkB agonist deoxygedunin protects nigrostriatal dopaminergic neurons from 6-OHDA and MPTP induced neurotoxicity in rodents. *Neuropharmacology* **99**, 448-458.
- North, T., Goessling, W., Walkley, C., Lengerke, C., Kopani, K., Lord, A., Weber, G., Bowman, T., Jang, I., Grosser, T., et al.** (2007). Prostaglandin E2 regulates vertebrate haematopoietic stem cell homeostasis. *Nature* **447**, 1007-1011.
- Owens, K. N., Santos, F., Roberts, B., Linbo, T., Coffin, A. B., Knisely, A. J., Simon, J. A., Rubel, E. W. and Raible, D. W.** (2008). Identification of genetic and chemical modulators of zebrafish mechanosensory hair cell death. *PLoS Genet.* **4**, e1000020.
- Patra, C., Monk, K. and Engel, F.** (2014). The multiple signaling modalities of adhesion G protein-coupled receptor GPR126 in development. *Receptors Clin Investig.* **1**, 79.



- Patra, C., van Amerongen, M., Ghosh, S., Ricciardi, F., Sajjad, A., Novoyatleva, T., Mogha, A., Monk, K., Mühlfeld, C. and Engel, F.** (2013). Organ-specific function of adhesion G protein-coupled receptor GPR126 is domain dependent. *Proc. Natl. Acad. Sci. USA* **110**, 16898-16903.
- Pedregosa, F., Varoquaux, G., Gramfort, A., Michel, V., Thirion, B., Grisel, O., Blondel, M., Prettenhofer, P., Weiss, R., Dubourg, V., et al.** (2011). Scikit-learn: Machine Learning in Python. *J. Mach. Learn. Res.* **12**, 2825–2830.
- Pendleton, J. C., Shablott, M. J., Gary, D. S., Belegu, V., Hurtado, A., Malone, M. L. and McDonald, J. W.** (2013). Chondroitin sulfate proteoglycans inhibit oligodendrocyte myelination through PTPsigma. *Exp Neurol* **247**, 113-121.
- Petersen, S., Luo, R., Liebscher, I., Giera, S., Jeong, S., Mogha, A., Ghidinelli, M., Feltri, M., Schöneberg, T., Piao, X., et al.** (2015). The adhesion GPCR GPR126 has distinct, domain-dependent functions in Schwann cell development mediated by interaction with laminin-211. *Neuron* **85**, 755-769.
- Pouretzadi, S., Cheng, C., Chambers, J., Drummond, B. and Wingert, R.** (2016). Prostaglandin signaling regulates nephron segment patterning of renal progenitors during zebrafish kidney development. *Elife* **5**, pii: e17551.
- Prasanna, X., Sengupta, D. and Chattopadhyay, A.** (2016). Cholesterol-dependent Conformational Plasticity in GPCR Dimers. *Sci Rep* **6**, 31858.
- Ravenscroft, G., Nolent, F., Rajagopalan, S., Meireles, A., Paavola, K., Gaillard, D., Alanio, E., Buckland, M., Arbuckle, S., Krivanek, M., et al.** (2015). Mutations of GPR126 are responsible for severe arthrogyposis multiplex congenita. *Am J. Hum. Genet.* **96**, 955-961.
- Rennekamp, A., Huang, X., Wang, Y., Patel, S., Lorello, P., Cade, L., Gonzales, A., Yeh, J., Caldarone, B., Roth, B., et al.** (2016).  $\sigma$ 1 receptor ligands control a switch between passive and active threat responses. *Nat. Chem. Biol.* **12**, 552-558.
- Ricciardelli, C., Sakko, A. J., Ween, M. P., Russell, D. L. and Horsfall, D. J.** (2009). The biological role and regulation of versican levels in cancer. *Cancer and Metastasis Reviews* **28**, 233-245.
- Richter, S., Schulze, U., Tomançak, P. and Oates, A.** (2017). Small molecule screen in embryonic zebrafish using modular variations to target segmentation. *2017* **8**, 1901.
- Rogers, D. and Hahn, M.** (2010). Extended-Connectivity Fingerprints. *J. Chem. Inf. Model.* **50**, 742–754.
- Salzman, G., Zhang, S., Gupta, A., Koide, A., Koide, S. and Araç, D.** (2017). Stachel-independent modulation of GPR56/ADGRG1 signaling by synthetic ligands directed to its extracellular region. *Proc. Natl. Acad. Sci. USA* **114**, 10095-10100.
- Salzman, G. S., Ackerman, S. D., Ding, C., Koide, A., Leon, K., Luo, R., Stoveken, H. M., Fernandez, C. G., Tall, G. G., Piao, X., et al.** (2016). Structural Basis for Regulation of GPR56/ADGRG1 by Its Alternatively Spliced Extracellular Domains. *Neuron* **91**, 1292-1304.
- Schampel, A., Volovitch, O., Koeniger, T., Scholz, C. J., Jorg, S., Linker, R. A., Wischmeyer, E., Wunsch, M., Hell, J. W., Ergun, S., et al.** (2017). Nimodipine fosters remyelination in a mouse model of multiple sclerosis and induces microglia-specific apoptosis. *Proc Natl Acad Sci U S A* **114**, E3295-E3304.
- Shannon, P., Markiel, A., Ozier, O., Baliga, N., Wang, J., Ramage, D., Amin, N., Schwikowski, B. and Ideker, T.** (2003). Cytoscape: A Software Environment for Integrated Models of Biomolecular Interaction Networks. *Genome Res.* **13**, 2498-2504.
- Sharma, R., Wang, J. and Wu, Z.** (1997). Mechanisms of inhibition of calmodulin-stimulated cyclic nucleotide phosphodiesterase by dihydropyridine calcium antagonists. *J. Neurochem.* **69**, 845-850.
- Silver, J. and Miller, J. H.** (2004). Regeneration beyond the glial scar. *Nat Rev Neurosci* **5**, 146-156.
- Sriram, K. and Insel, P.** (2018). G Protein-Coupled Receptors as Targets for Approved Drugs: How Many Targets and How Many Drugs? *Mol. Pharmacol.* **93**, 251-258.

- Stoveken, H., Larsen, S., Smrcka, A. and Tall, G.** (2018). Gedunin- and Khivorin-Derivatives Are Small-Molecule Partial Agonists for Adhesion G Protein-Coupled Receptors GPR56/ADGRG1 and GPR114/ADGRG5. *Mol. Pharmacol.* **93**, 477-488.
- Subramani, R., Gonzalez, E., Nandy, S., Arumugam, A., Camacho, F., Medel, J., Alabi, D. and Lakshmanaswamy, R.** (2017). Gedunin inhibits pancreatic cancer by altering sonic hedgehog signaling pathway. *Oncotarget* **8**, 10891-10904.
- Tang, Y. D., Zheng, X. S., Ying, T. T., Yuan, Y. and Li, S. T.** (2015). Nimodipine-mediated remyelination after facial nerve crush injury in rats. *J Clin Neurosci* **22**, 1661-1668.
- Thisse, C. and Thisse, B.** (2008). High-resolution in situ hybridization to whole-mount zebrafish embryos. *Nat. Protoc.* **3**, 59-69.
- Thompson, S., Wingrove, P., Connelly, L., Whiting, P. and Wafford, K.** (2002). Tracazolate reveals a novel type of allosteric interaction with recombinant gamma-aminobutyric acid(A) receptors. *Mol. Pharmacol.* **61**, 661-669.
- Tocci, G., Desideri, G., Roca, E., Calculo, C., Crippa, M., De Luca, N., Gaudio, G., Lonati, L., Orselli, L., Scuteri, A., et al.** (2018). How to Improve Effectiveness and Adherence to Antihypertensive Drug Therapy: Central Role of Dihydropyridinic Calcium Channel Blockers in Hypertension. *High Blood Press Cardiovasc Prev* **25**, 25-34.
- Urban, N., Wang, L., Kwiek, S., Rademann, J., Kuebler, W. and Schaefer, M.** (2016). Identification and Validation of Larixyl Acetate as a Potent TRPC6 Inhibitor. *Mol. Pharmacol.* **89**, 197-213.
- Vettori, A., Greenald, D., Wilson, G., Peron, M., Facchinello, N., Markham, E., Sinnakaruppan, M., Matthews, L., McKeating, J., Argenton, F., et al.** (2017). Glucocorticoids promote Von Hippel Lindau degradation and Hif-1 $\alpha$  stabilization. *Proc. Natl. Acad. Sci. USA* **114**, 9948-9953.
- Waller-Evans, H., Prömel, S., Langenhan, T., Dixon, J., Zahn, D., Colledge, W. H., Doran, J., Carlton, M. B., Davies, B., Aparicio, S. A., et al.** (2010). The orphan adhesion-GPCR GPR126 is required for embryonic development in the mouse. *PLoS One* **5**, e14047.
- Weininger, D.** (1988). SMILES, a chemical language and information system. 1. Introduction to methodology and encoding rules. *J. Chem. Inf. Comput. Sci.* **28**, 31-36.
- Weisman, J., Liou, A., Shelat, A., Cohen, F., Guy, R. and DeRisi, J.** (2006). Searching for new antimalarial therapeutics amongst known drugs. *Chem. Biol. Drug Des.* **67**, 409-416.
- Westerfield, M.** (2000). *The zebrafish book. A guide for the laboratory use of zebrafish (Danio rerio)* (4 edn). Eugene: University of Oregon Press.
- Whitfield, T. T., Granato, M., van Eeden, F. J. M., Schach, U., Brand, M., Furutani-Seiki, M., Haffter, P., Hammerschmidt, M., Heisenberg, C.-P., Jiang, Y.-J., et al.** (1996). Mutations affecting development of the zebrafish inner ear and lateral line. *Development* **123**, 241-254.
- Wight, T. N., Frevert, C. W., Debley, J. S., Reeves, S. R., Parks, W. C. and Ziegler, S. F.** (2017). Interplay of extracellular matrix and leukocytes in lung inflammation. *Cell Immunol* **312**, 1-14.
- Willett, P., Barnard, J. and Downs, G.** (1998). Chemical Similarity Searching. *J. Chem. Inf. Comput. Sci.* **38**, 983-996.
- Wooten, D., Christopoulos, A., Marti-Solano, M., Babu, M. and Sexton, P.** (2018). Mechanisms of signalling and biased agonism in G protein-coupled receptors. *Nat. Rev. Mol. Cell Biol.* **19**, 638-653.
- Yu, P., Hong, C., Sachidanandan, C., Babitt, J., Deng, D., Hoyng, S., Lin, H., Bloch, K. and Peterson, R.** (2008). Dorsomorphin inhibits BMP signals required for embryogenesis and iron metabolism. *Nat. Chem. Biol.* **4**, 33-41.
- Zada, D., Tovin, A., Lerer-Goldshtein, T. and Appelbaum, L.** (2016). Pharmacological treatment and BBB-targeted genetic therapy for MCT8-dependent hypomyelination in zebrafish. *Dis Model Mech* **9**, 1339-1348.
